## **Disability Training for Health Workers: A Global Narrative Systematic Review**

Sara Rotenberg, BS <sup>a</sup>; Danae Rodríguez Gatta, BSc., MSc. <sup>b</sup>; Azizia Wahedi, HBSc., MSc. <sup>c</sup>; Rachelle Loo, BSc. <sup>d</sup>; Emily McFadden, MA, MSc, PhD,<sup>e</sup>; Sara Ryan, BSc, PhD,<sup>f</sup>

<sup>a</sup> Nuffield Department of Primary Care Health Sciences, University of Oxford

<sup>b</sup> International Centre for Evidence in Disability, London School of Hygiene and Tropical Medicine

<sup>c</sup> Medical Sciences Division, University of Oxford

<sup>d</sup> Cumming School of Medicine, University of Calgary

<sup>e</sup> Centre for Evidence-Based Medicine, University of Oxford

<sup>f</sup> Faculty of Health, Psychology, and Social Care, Manchester Metropolitan University

### **ABSTRACT**

**Background:** Health worker training on disability is a recognized component of achieving high standards of health for people with disabilities, given that health worker's lack of knowledge, stigma, and negative attitudes towards people with disabilities act as barriers to high quality health care.

**Objective:** To understand the published literature on training health workers about disability.

**Methods:** We searched five databases for relevant peer-reviewed articles published between January 2012 and January 2021. Studies that focused on training health care workers to improve knowledge, confidence, self-efficacy, and competence to support people with physical, sensory, or intellectual impairments were included. Data about the details of the intervention (setting, participants, format, impact assessments, etc.) and its effects were extracted.

**Results:** There is an array of highly local tools to train health workers across stages of their training and careers (pre-service, in-service, and continuing professional development). Studies involving people with disabilities in the training, community placements, simulations, or interactive sessions were found to be most effective in improving knowledge, confidence, competency, and self-efficacy.

**Conclusions:** As part of initiatives to build inclusive health systems and improve health outcomes for people with disabilities, health workers around the world need to receive appropriate and evidence-based training that combine multiple methods and involve people with disabilities.

## **BACKGROUND**

Human resources for health are at the heart of high-quality health systems. It is critical to improve health worker training to improve health care for populations that are systematically marginalized by health systems, such as people with disabilities. The World Health Organization (WHO) estimates that people with disabilities make up 15% of the world's population.<sup>1</sup> People with disabilities often face significant barriers to health care, including lack of accessible transport and facilities, limited financial protection, poor health worker attitudes that result in worse outcomes or limited health worker training on disability.<sup>2</sup> Even in countries where there is guaranteed universal access and financial protection, health workers' unfamiliarity with disability, or negative attitudes towards people with disabilities, can not only foster an unwelcoming environment, but also contribute to high rates of patient safety issues and poor quality care.<sup>1</sup>

Health worker training on disability is a recognized component of achieving high standards of health for people with disabilities. While the UN Convention on the Rights of Persons with Disabilities (UNCRPD) Article 25<sup>3</sup> has specific requirements on access to health care and SDG monitoring on health worker disability training, the recent World Health Assembly resolution most eminently highlights the role of health worker training in removing barriers to health care for people with disabilities.<sup>4</sup> In addition, recent studies have highlighted the need to improve health care workers' attitudes, knowledge, and competency to provide care for people with disabilities. For example, a US study illustrated that just 40.7% of physicians were confident about providing care to patients with disabilities and most (82.4%) perceived that people with significant disabilities have worse quality of life. Similarly, a study found that 87% of nursing

students implicitly associated negative traits with physical disability, which may influence clinician behaviour. These studies illustrate the need to improve health workers' confidence, competency, attitudes, and comfort in treating patients with disabilities. Given these international agreements and recent studies, it is important that countries around the world begin to integrate disability training systematically and use examples of successful interventions as models.

This review directly builds on a previous review by Shakespeare and Kleine that explored health worker training on disability between 2000 and 2011.<sup>5</sup> The study found that, while there are numerous interventions to teach medical professionals about disability, there are few common philosophical underpinnings, insufficient hands-on experience, and more opportunities to incorporate disability across the curriculum.<sup>5</sup> Since this review, additional systematic reviews have examined health worker training on people with disabilities for certain populations of health workers<sup>6</sup>, certain impairments,<sup>7</sup> or geographic areas.

Given renewed international commitments to health worker training on disability and country-level plans in Australia<sup>8</sup> and the UK<sup>9</sup> to train health workers on specific types of disability, it is important to update Shakespeare and Kleine's review<sup>5</sup> and outline the types of interventions to improve health worker's knowledge, confidence, self-efficacy, and competence in treating patients with disabilities. Understanding the ways in which health workers receive training on disability, will facilitate adjusting system-level policies and individual-level practices to improve care for people with disabilities. Ultimately, this review will help to understand the types of training that support positive and sustained improvements in service delivery for health workers serving people with disabilities.

## **METHODS**

### *Search Strategy*

Electronic searches were conducted for the EMBASE, Global Health, Medline, CINAHL, ASSIA and Web of Science databases between 18-19 January 2021. Search terms were developed in three domains: disability, health education, and health workers. Disability terms were general, focusing on various types of impairments; health education terms targeted aspects of health training (i.e., ‘core competency’, ‘patient encounter’, ‘standardized patient’, etc.); and health worker terms were developed using key terms from WHO’s International Classifications of Health Workers.<sup>10</sup> Terms were developed using MeSH, keywords, or equivalent as well as from other reviews on similar topics and searches were limited to papers in English, French, or Spanish. These parameters and strategy were agreed upon by the authors and a research librarian before the search was conducted to ensure there were adequate words to capture articles across the three domains examined. The Preferred Reporting Items for Systematic Reviews and Meta-Analysis (PRISMA) statement was followed for conducting and reporting the review (PROSPERO Registration: CRD42021231120). All studies identified by the review were exported into an EndNote database (version X20, Clarivate Analytics, Philadelphia, PA, USA) and then exported into Rayyan (Qatar Computing Research Institute, Qatar) for screening.<sup>11</sup>

### *Selection Criteria*

Our search strategy sought to identify peer-reviewed articles from around the world published between January 2012 and 2021. Given a previous systematic review covered this topic until 2011<sup>5</sup>, the search included articles published from 2012-January 2021 and included all health worker types, health education levels, and disability globally. The inclusion criteria required that

studies were: qualitative and/or quantitative in methods; included a complete description of the intervention; explicit evaluation of the training's impact (i.e., pre- and/or post-training evaluations, follow-up surveys, etc.); and had a particular focus on improving disability competency, knowledge, confidence, self-efficacy, curricula, or teaching methods. Studies examining health worker attitudes towards people with disabilities were excluded on the basis that a positive attitude does not necessarily guarantee improved competency or care outcomes. Studies that measured attitudes alongside other criteria were included. Finally, the abundance of articles on training health workers about mental health, the authors decided that this topic merited further, independent exploration, and, therefore, we excluded papers that trained health workers only about mental health. Only papers that looked at physical, sensory, intellectual or developmental impairments were included.

### *Data Extraction*

All data were extracted into a Google Sheet developed for this review. 78 full-text articles underwent data extraction, following a title, abstract, and full-text review by two reviewers (SRo and DR). An additional three reviewers (SRo, AW, RL) extracted data related to the general study information, setting, country, health worker cadre, number of participants, type of disability, features of the intervention, impact measurement, and outcomes. The extraction was double-checked by a second reviewer and collectively checked again by the extractors (SRo, AW, RL). Any conflicts in inclusion or extraction were resolved through discussion with a third and/or fourth member of the review team.

**Fig 1. Flow chart of selected studies to review health worker training on disability** <sup>12</sup>

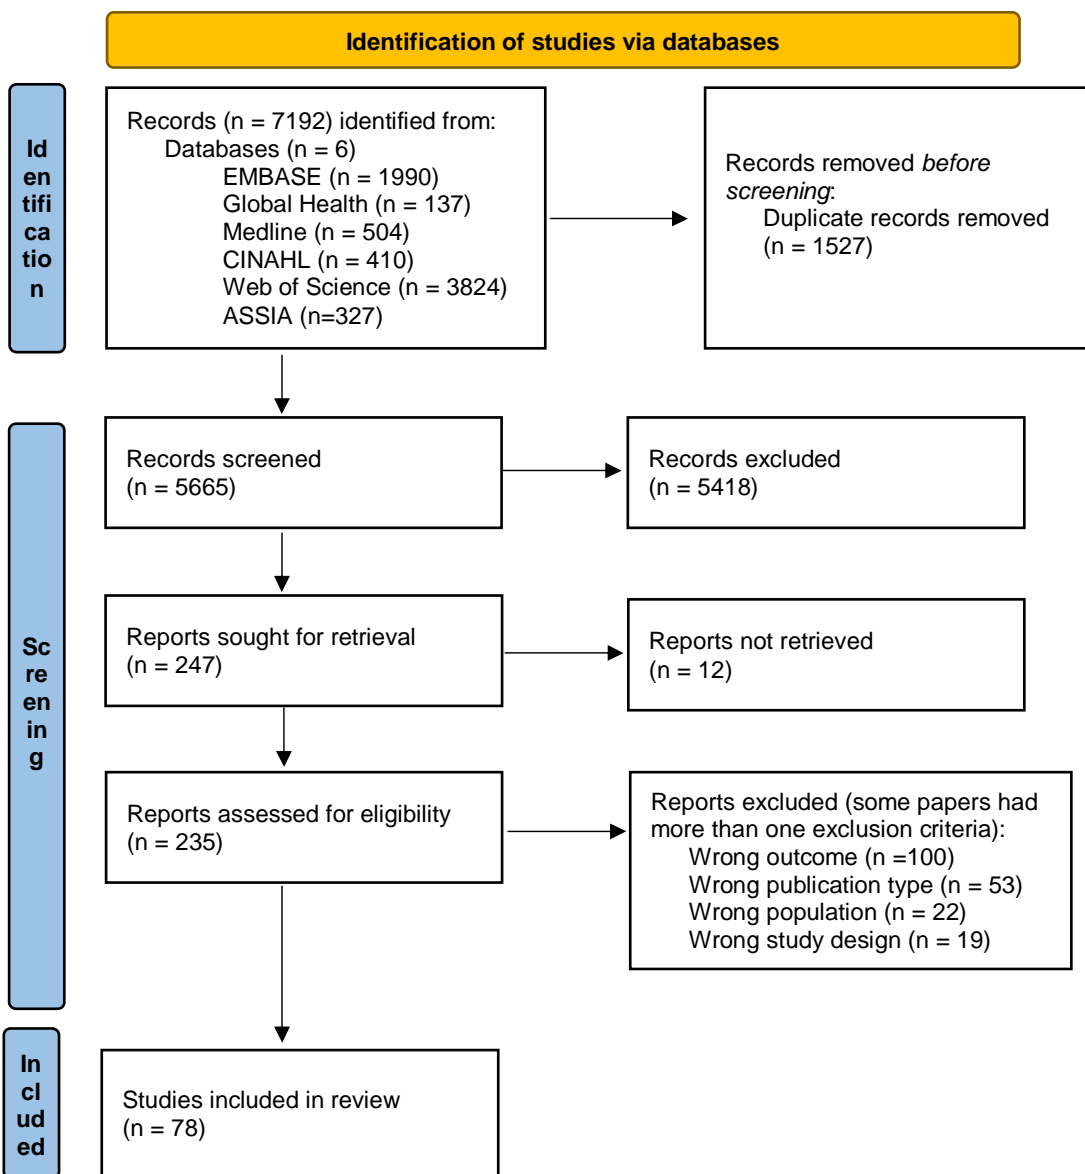

Given the wide array of study instruments and outcomes used to assess training impact, a meta-analysis could not be conducted, and a narrative synthesis was conducted instead. Quality and bias assessments were conducted by at least two reviewers in accordance with the SIGN50 (Scottish Intercollegiate Guidelines Network Checklists) and modified slightly from previous methods.<sup>13</sup>

Studies were rated as low bias, if all or almost all of the criteria were fulfilled, and those that were not fulfilled were thought unlikely to alter the conclusions of the study; medium, if some of the criteria were fulfilled, and those not fulfilled were thought unlikely to alter the conclusions of the study; or high, if few or no criteria were fulfilled, and the conclusions of the study were thought likely or very likely to alter with their inclusion.

## RESULTS

The preliminary search identified 5,665 articles for title and abstract screening, after 1,527 duplicates were removed. Following screening, 247 articles were included for full-text review. Twelve studies were excluded because full-texts could not be retrieved and a further 154 studies did not meet the inclusion criteria as shown in Fig.1., and 3 articles included in the review were excluded during extraction because of an unclear intervention (n=1) and wrong population group (n=2).<sup>14</sup>

Included studies (n=78) represented a range of geographies, health workers, and intervention types. Among these, there were studies from 19 countries, including seven low- and middle-income countries.<sup>15</sup> Most studies took place in the United States (n=35), followed by the United Kingdom (n=13). Among the studies included, 30 were rated as low, 43 as medium, and five as high risk of bias [Supplementary Materials]. Studies varied in whether they were mandatory or optional; free or paid; and for certification or elective; however, many studies did not include this information. Various cadres of health workers were included in the study; doctors, medical students or residents (n=37), and nurses or nursing students (n=17) were the main recipients of training. These health workers were generally trained in the pre-qualification stage (n=52), though there were several in-service (n=7) and continuing professional development (CPD) programs (n=19). The review included studies across disability groups; the most common focus

was training about people with intellectual and developmental disabilities (n=41), followed by general programs about people with disabilities (n=16). Most studies measured improvements in knowledge (n=57) and competence (n=42) outcomes, yet most studies used a self-designed evaluation instrument (n=54). There was a wide variety of techniques to train health workers about disability, including lectures or other didactic methods (n=65), and case studies (n=28); the majority of studies (n=58) used multiple teaching modalities [Appendix A].

### ***Lecture/Didactic Methods***

Most (n=65) studies included lectures or didactic methods, such as videos, multi-media formats, or online coursework. Many studies used these opportunities to introduce health professionals to the topic of disability from a rights-based perspective to enhance attitudes, awareness, and knowledge about disability. Some studies also taught particular skills that could be applied in-practice, such as an elective sign language class for medical and pharmacology terms<sup>16</sup> to improve skills for engaging with d/Deaf or hard of hearing individuals. Lectures were often combined with some other intervention (case study or simulation) to apply knowledge learned from the lecture. Participants in combined programs identified the content to be quite engaging and contributed to greater improvements in key outcomes. However, for those who only completed lecture or didactic-based methods, there were still improvements in the general outcomes, but it was often less significant than studies that combined multiple methods<sup>14,17,18</sup>. Finally, some programs utilized novel, innovative technology and multimedia tools to teach about disability in a more engaging method than traditional lectures or didactic methods. For example, one study designed multi-media tools (MMLTs) to teach medical students about common visual impairments and compared the knowledge scores with those who had read a



textbook. The findings highlight the importance of engaging material, as while there was no significant difference in knowledge (except for cataract recognition), the MMLT took less time and 87% of individuals found it more enjoyable than traditional teaching methods.<sup>19</sup>

### ***People with Disabilities as Teachers***

Recognizing the important role of self-advocates and patients as educators<sup>5</sup>, several studies (n=19) invited people with disabilities to share their experiences in the health system, portray standardized patients, or give a lecture. Some universities hired people with disabilities to participate in simulated patient programs, while others asked patients to participate voluntarily. Many others found creative ways of engaging with people with disabilities. Cardiff University, for example, hired a self-advocacy theatre group to run a simulation and icebreaker activity.<sup>20</sup> These activities added a non-clinical dimension to medical training about disability, as it allowed participants to explore disability outside the health worker-patient relationship and engage in dialogue. Studies that measured participants comfort and attitudes before and after a person with a disability as a teacher demonstrated that participants felt the non-clinical interaction enhanced their comfort and attitudes towards people with disabilities.<sup>21, 22</sup>

**Table 1: Characteristics of Included Studies**

| Variable                                                                                                                           | Number | Percentage (%) |
|------------------------------------------------------------------------------------------------------------------------------------|--------|----------------|
| <b>Training Location</b>                                                                                                           |        |                |
| North America                                                                                                                      | 40     | 51.2           |
| Europe                                                                                                                             | 22     | 28.2           |
| Asia                                                                                                                               | 6      | 7.7            |
| Oceania                                                                                                                            | 4      | 5.1            |
| Africa                                                                                                                             | 4      | 5.1            |
| South America                                                                                                                      | 2      | 2.5            |
| <b>Disability Focus of Training*<sup>‡</sup></b>                                                                                   |        |                |
| Intellectual and developmental                                                                                                     | 41     | 51.9           |
| All types of disabilities/unspecified                                                                                              | 16     | 20.3           |
| Physical/motor                                                                                                                     | 13     | 15.2           |
| Communication                                                                                                                      | 9      | 11.4           |
| D/deaf and hard of hearing                                                                                                         | 8      | 10.1           |
| Visual impairment                                                                                                                  | 3      | 3.8            |
| Sensory impairment                                                                                                                 | 2      | 2.5            |
| <b>Health Worker Type*<sup>‡</sup></b>                                                                                             |        |                |
| Medics                                                                                                                             | 37     | 35.2           |
| Nurses                                                                                                                             | 17     | 16.2           |
| Occupational and Physical Therapists                                                                                               | 17     | 15.2           |
| Allied Health Professionals                                                                                                        | 8      | 7.6            |
| Dentists                                                                                                                           | 7      | 6.7            |
| Audiologists and Speech Language Pathologists                                                                                      | 6      | 5.7            |
| Psychologists                                                                                                                      | 4      | 3.8            |
| Personal Care Workers                                                                                                              | 5      | 4.8            |
| Community Health Workers                                                                                                           | 2      | 1.9            |
| Pharmacists                                                                                                                        | 2      | 1.9            |
| <b>Teaching Method*</b>                                                                                                            |        |                |
| Lecture/didactic methods                                                                                                           | 65     | 34.7           |
| Case study                                                                                                                         | 28     | 14.9           |
| Clinical encounter                                                                                                                 | 26     | 13.9           |
| Placements, experiential, and community-based learning                                                                             | 25     | 13.4           |
| Simulation                                                                                                                         | 24     | 12.8           |
| People with disabilities as a teacher                                                                                              | 19     | 10.1           |
| <b>Intervention Outcomes*</b>                                                                                                      |        |                |
| Knowledge                                                                                                                          | 57     | 28.4           |
| Competence                                                                                                                         | 42     | 20.9           |
| Attitudes                                                                                                                          | 31     | 15.4           |
| Confidence                                                                                                                         | 24     | 11.9           |
| Comfort                                                                                                                            | 15     | 7.5            |
| Communication skills                                                                                                               | 12     | 6.0            |
| Self-Efficacy                                                                                                                      | 11     | 5.5            |
| Other related outcomes                                                                                                             | 9      | 4.5            |
| *Total number is greater than 78 because studies included multiple variables                                                       |        |                |
| <sup>‡</sup> categories include students and residents who are in training to become fully qualified as this type of health worker |        |                |

### ***Case Studies***

Case studies are a common tool in medical education to prepare health workers holistically for their education, provided they have clear structure, details, and observations.<sup>23</sup> Accordingly, many studies used case studies (n=28) as a way of learning how to improve care for people with disabilities. These tools were especially common in continuing professional development, as some programs ask patients to bring case examples to review anonymously to improve care<sup>24, 25</sup> or were to spur reflection on their own work. Several case studies were conducted through online learning or innovative interactive methods. For example, the City University of London created CitySCaPE, which is a multi-media simulation that simulated different patient cases of people with intellectual disabilities with nursing students.<sup>26</sup> These types of case studies that blended the traditional case study and simulation aspects created greater engagement in settings where in-person or clinical encounters were not possible.

### ***Placements, experiential, and community-based learning***

Placements, experiential, and community-based learning (n=25) methods were sustained opportunities to engage with people with disabilities in clinical and alternative settings that were common in in-service and pre-qualification training. For example, some studies examined the impact of clerkship placements in specialized clinics for people with disabilities,<sup>27</sup> while others looked at nurses and occupational therapists' improvements after participating in a week-long summer camp for children with disabilities.<sup>28</sup> In the clinical setting, students found that they improved skills because they were able to engage with people with disabilities for extended periods, rather than a singular interaction. Furthermore, the out-of-clinic engagement, such as at camps, schools, or residential settings helped illustrate the non-medical and everyday lives of people with disabilities.

### *Simulations*

Simulations were found to be helpful tools to support skill development and learning outside of health worker-patient interactions. Many speech-language pathology, nursing, and medical student programs used simulations (n=24) as tools to develop confidence and communication skills when treating patients with communication disorders.<sup>29,30, 31</sup> In addition, several medical schools integrated disability training into existing clinical simulation skills labs to improve care for people with disabilities. For example, at the University of Gothenburg medical students were videotaped during a simulated patient exercise to reflect on improving communications skills, particularly for the simulated patient with an acquired communication disorder.<sup>31</sup> Overall, the simulations were useful tools for improving knowledge, comfort, and competency in a low-pressure environment that is applicable to serving people with disabilities.

### *Clinical Encounters*

Several programs (n=26) included singular clinical encounters with patients with disabilities as part of their disability training. These were often day-long programs to familiarize students with providing care and were predominantly focused on improving knowledge and competency.<sup>32</sup> Most students who participated in these programs were advanced (i.e., penultimate or final year students) who had previously had some education on providing care to people with disabilities. These opportunities focused on practicing clinical skills to treat patients with disabilities, and, despite the short exposure, did significantly affect participant's key outcome scores. For instance, clinical encounters used in CPD, such as in Rwanda, where instructors in a physiotherapist training program went to participants' clinics to provide immediate feedback on their practice.<sup>33</sup>

### ***Multi-pronged approach***

Approximately 75% of papers utilized a combination of methods to have impact on training participants. These multi-pronged approaches helped reach various learning styles and cement learning. Two papers included in this review utilized all of the interventions measured in this paper. For example, two State University of New York medical colleges demonstrated the importance of integrating disability across health worker curricula, as all participants significantly improved their knowledge, attitudes, and core competencies in treating patients with disabilities.<sup>34</sup> Similarly, the University of South Florida had a 12-week clinical clerkship that involved classroom simulations, lectures, case studies, people with disabilities as teachers, and a twice-weekly placement in a community clinic that served people with disabilities. The immersion helped to significantly improve knowledge, attitudes, and comfort.<sup>35</sup>

## **DISCUSSION**

Numerous studies and examples serve as successful models to train health workers about disability and improve knowledge, competence, skills, self-efficacy, and confidence to treat patients with disabilities. All teaching methods had some positive impact on the outcomes measured in this study, regardless of health worker type, location, or training stage, though the most commonly used were lecture/didactic methods and case studies. Part of the success of these programs was the multi-pronged nature of the approach, as 75% of studies used multiple teaching methods. The two examples that utilized all teaching interventions demonstrate the importance of a multi-pronged approach that emphasizes mainstreaming disability in health curricula, either through sustained engagement in a curricula<sup>34</sup> or an intensive placement.<sup>35</sup>

However, limited information about commonalities in curricula could be extracted from the data, given the diversity of interventions methods and topics.

It is important to note that these findings are not substantially different from the 2011 review.<sup>5</sup>

Similar methods are still used to teach health workers on disability and each example is highly localized, within either a certain school or region, other than two studies that examined national-level training programs.<sup>33,36</sup> The limited evidence of systemic integration of disability training within health worker practices is concerning in this context as the current status of training appears to depend on where you received your training, where you live, or where you work. Enacting systemic-level change to ensure all health workers have the same level of high-quality training on disability will contribute to providing consistent, high-quality care and outcomes for people with disabilities.

Similarly, there was limited standardization in tools used to measure the impact of disability training on health workers. Of the 78 studies, nearly 70% designed their own instruments, and only two studies included the same standardized measure of outcomes.<sup>37,38</sup> Few studies measured the longevity of the intervention's impact. Sustained approaches that mainstream disability should help to ensure learning is not performative for post-intervention evaluation, but actually effect change. This finding was previously noted<sup>5</sup> and there has been little improvement. Developing a common, standardized cross-disability tool or protocol for evaluating immediate and long-term intervention impact may help support monitoring and evaluation efforts to further refine and improve training.

While the review uncovered many examples of disability training, one of the main limitations of the study is that it only highlights published examples of studies, which can leave out unpublished examples. Furthermore, without greater follow-up evaluation or standardization in evaluation, it is difficult to assess the longevity and quality of impact to understand impact of training definitively. On the other hand, this study reveals some adaptable examples of how to integrate disability training into all stages of health worker training and development, which can serve as models for inclusion efforts around the world.

## **CONCLUSION**

Significant health disparities and poor-quality health care still exist for people with disabilities around the world. Without normalizing disability training as part of high-quality health worker training, there will continue to be limited progress on improving outcomes for people with disabilities. Catalyzing the post-pandemic health systems strengthening efforts to include these evidence-based and effective health worker training on disability can contribute to improved care and outcomes for people with disabilities.

## Appendix A: Details of interventions in included studies

| Citation                           | Place                                                                               | Sample                                                                                       | Type of Disability Covered                 | Intervention Details                                                                                                                                                                                                                                                                                                                                                                                                          | Didactic | PWD as Teacher | Case study | Placement | Simulation | Encounter | Outcomes Measured                                               | Description of Outcomes                                                                                                                                                                                                                                                                                                                                                                                                                                                                                                                 |
|------------------------------------|-------------------------------------------------------------------------------------|----------------------------------------------------------------------------------------------|--------------------------------------------|-------------------------------------------------------------------------------------------------------------------------------------------------------------------------------------------------------------------------------------------------------------------------------------------------------------------------------------------------------------------------------------------------------------------------------|----------|----------------|------------|-----------|------------|-----------|-----------------------------------------------------------------|-----------------------------------------------------------------------------------------------------------------------------------------------------------------------------------------------------------------------------------------------------------------------------------------------------------------------------------------------------------------------------------------------------------------------------------------------------------------------------------------------------------------------------------------|
|                                    |                                                                                     |                                                                                              |                                            |                                                                                                                                                                                                                                                                                                                                                                                                                               |          |                |            |           |            |           |                                                                 |                                                                                                                                                                                                                                                                                                                                                                                                                                                                                                                                         |
| <b>PRE-QUALIFICATION</b>           |                                                                                     |                                                                                              |                                            |                                                                                                                                                                                                                                                                                                                                                                                                                               |          |                |            |           |            |           |                                                                 |                                                                                                                                                                                                                                                                                                                                                                                                                                                                                                                                         |
| Thew et al. 2012 <sup>39</sup>     | University of Rochester School of Medicine and Dentistry, USA                       | First-year medical students (n=99)                                                           | Hard of hearing and D/deaf people          | Students participated in lectures about deaf people and their experiences in health care. They also participate in a role-reversal program where medical students are given a scenario to simulate being deaf in different health settings and are encouraged to use alternative forms of communication, such as interpreters, American Sign Language (ASL), gestures, or notes. Finally, deaf volunteers and lead a debrief. | x        | x              |            |           |            |           | knowledge, competence                                           | Students report increasing cultural, linguistic, and communication skills, particularly for deaf patients. Long-term follow up also shows that students enjoy learning from deaf participants and apply the lessons to their practice, including with other non-English speaking patients.                                                                                                                                                                                                                                              |
| Gilmore et al. 2019 <sup>14</sup>  | Queen's University Belfast, UK                                                      | Second year medical students (n=59)                                                          | Hard of hearing and D/deaf people          | 29 second-year students participated in a deaf awareness and sign-language module were compared to 30 controls to examine the course's impact on attitudes and knowledge of deafness. Previous participants were also contacted and evaluated to assess long-term impact.                                                                                                                                                     | x        |                |            |           |            |           | knowledge, attitudes                                            | After completing the module, students had significantly improved attitudes and knowledge to treat deaf individuals in comparison to the control group (p<0.05). There was also a significant negative association between years since undertaking the module and attitudes score (r=-0.29, p=0.04, n=51), with no significant association for knowledge score (r=0.22, p=0.11, n= 52).                                                                                                                                                  |
| Smith et al. 2016 <sup>40</sup>    | School of Nursing at Kingston University and St George's, University of London, UK  | First year nursing students (n=114)                                                          | People with intellectual disabilities (ID) | 45-minute session developed and led by people with intellectual disabilities (with input from school lecturers) about their experiences accessing and receiving health and social care.                                                                                                                                                                                                                                       |          |                | x          |           |            |           | Knowledge, attitudes, confidence, comfort, communication skills | The session helped students reflect and improve how they interact with (94%), comfort to interact with (75%), and understanding of negative experiences health and social care system (87%), and confidence to work with people with intellectual disabilities (83%). Students expressed greater knowledge, changed attitudes, and greater engagement in material because of the direct involvement of people with intellectual disabilities.                                                                                           |
| Iannuzzi et al. 2019 <sup>22</sup> | University of Massachusetts Medical School's (UMMS) Graduate School of Nursing, USA | Rising third year Doctor of Nurse Practice Family Nurse Practitioner Program students (n=16) | Autism Spectrum Disorder (ASD)             | Groups that were exposed to content at different points in the course: Lectures on ASD and common comorbidities given by developmental disability nurses; online modules on epidemiology, medical and diagnosis issues for ASD; and participation in Operation House Call, a parent- and self-advocate program to match health students with transition-aged youth.                                                           | x        | x              | x          | x         |            | x         | self-efficacy, knowledge, attitudes                             | The intervention improved their comfort, self-efficacy, attitudes, and competency in providing care to transition-aged youth. Increased knowledge of 7.91 (range -5 -15) compared to a decrease of -□3.43 (range -12.5 -7.5) for controls; increased attitudes by 3.1 points (range 0-7) compared to a decrease of -□6.25 points (range of -□3 to 3) for controls; and participants' self-efficacy for providing care to transition aged youth with ASD were 42.7 (range 24-61) compared to 5.19 (range: 5.0-27) for the control group. |
| Lapinski et al. 2015 <sup>41</sup> | Kirksville College of Osteopathic Medicine, USA                                     | Osteopathic medical students (n=33)                                                          | Hard of                                    | A four-hour workshop on ASL that included a presentation on deaf culture, key vocabulary (alphabet, numbers, medical                                                                                                                                                                                                                                                                                                          | x        | x              |            |           |            |           | confidence, competence                                          | There were significant improvements in participants self-ratings (2.1 pre-workshop (SD= 0.5) and 2.6 post-workshop (SD= 0.4), p=.001), standardized patient                                                                                                                                                                                                                                                                                                                                                                             |



|                                          |                                                                           |                                                                                                                 |                                                                              |                                                                                                                                                                                                                                                                                                                |   |   |   |   |   |   |  |  |   |  |  |  |                                                     |                                                                                                                                                                                                                                                          |                                                                                                                                                                                                                                                                                                                                         |
|------------------------------------------|---------------------------------------------------------------------------|-----------------------------------------------------------------------------------------------------------------|------------------------------------------------------------------------------|----------------------------------------------------------------------------------------------------------------------------------------------------------------------------------------------------------------------------------------------------------------------------------------------------------------|---|---|---|---|---|---|--|--|---|--|--|--|-----------------------------------------------------|----------------------------------------------------------------------------------------------------------------------------------------------------------------------------------------------------------------------------------------------------------|-----------------------------------------------------------------------------------------------------------------------------------------------------------------------------------------------------------------------------------------------------------------------------------------------------------------------------------------|
|                                          |                                                                           |                                                                                                                 | hearing and D/deaf people                                                    | words, etc.) and etiquette, stories from the Deaf community facilitators, and an overview of providing health care to deaf patients.                                                                                                                                                                           |   |   |   |   |   |   |  |  |   |  |  |  |                                                     | scores (pre-workshop encounter (49.6, SD=14.3) and the standardized patient post-workshop encounter (87.3, SD=10.1), $p < .001$ ), and knowledge (pre-workshop video quiz (3.6, SD= 3.0) and the post-workshop video quiz (16.8, SD= 3.1), $p < .001$ ). |                                                                                                                                                                                                                                                                                                                                         |
| Holzinger et al. 2020 <sup>42</sup>      | Medical University of Vienna, Austria                                     | Fourth-year dental students (n=154)                                                                             | Patients with paediatric, geriatric, psychiatric, and neurological disorders | Five 2-hour seminars (lecture and small group case studies) on managing dental needs of patients led by a dentist and specialist in the patient population and a practical course in the community.                                                                                                            | x |   | x | x |   |   |  |  |   |  |  |  | emotional reactions, acceptance, comfort, attitudes | Emotional reactions to, acceptance of, comfort with, and attitudes towards people with disabilities improved after the seminar and the practical course.                                                                                                 |                                                                                                                                                                                                                                                                                                                                         |
| Saunders and Knight, 2017 <sup>43</sup>  | City University London, UK                                                | Post-grad and undergraduate nursing students (n=146)                                                            | people with intellectual disabilities                                        | A three-hour, multi-media 'simulation of simulations' on caring for patients with intellectual disabilities. The intervention also includes group discussions and a workbook.                                                                                                                                  | x |   | x |   | x |   |  |  |   |  |  |  |                                                     | competence, confidence                                                                                                                                                                                                                                   | Undergraduate students felt their learning, confidence, and capabilities increased because of the engaging simulation methods. Overall, 91% of child, 94% of mental health, and 84% of adult nursing students agreed that the intervention prepared them for clinical practice and 90% of students indicated their knowledge increased. |
| Santoro et al. 2019 <sup>44</sup>        | Stanford University, USA                                                  | Medical students in pediatric clerkship (n=24)                                                                  | Intellectual, language, or motor disabilities                                | A RCT evaluating an intervention that includes lectures, bedside teaching, and five clinical learning scenarios compared to a lecture-only control. Conducted during core pediatrics rotations.                                                                                                                | x |   | x |   |   |   |  |  |   |  |  |  |                                                     | knowledge, attitudes                                                                                                                                                                                                                                     | Students' knowledge and attitudes improved more in the intervention group than the control group (mean test was 7.67 to 8.25 for the intervention group vs. 7.10 to 7.55 for the control group).                                                                                                                                        |
| Symons et al. 2014 <sup>34</sup>         | State University of New York at Buffalo and Syracuse Medical Schools, USA | Medical students (n=244)                                                                                        | All disability types                                                         | A new medical school curriculum that combines lectures, small group and structured encounters with people with disabilities and their families, clinical experiences, workshops, and elective options over four years to improve disability training.                                                          | x | x | x | x | x | x |  |  |   |  |  |  |                                                     | knowledge, attitudes                                                                                                                                                                                                                                     | Students who engaged in the curriculum had significant or nearly significant improvements in knowledge and attitudes towards people with disabilities compared with controls. However, men who participated in the clinical experience had more negative attitudes to people with disabilities ( $p = 0.005$ ).                         |
| Perusini et al. 2016 <sup>45</sup>       | Faculty of Dentistry, University of Toronto, Canada                       | Senior dental students (n=92)                                                                                   | People with disabilities (PWDs)                                              | Senior dental students participated in a mandatory clinic placement for people with disabilities.                                                                                                                                                                                                              |   |   |   |   |   |   |  |  | x |  |  |  | x                                                   | attitudes, comfort                                                                                                                                                                                                                                       | Participants showed that they had improved attitudes and comfort in treating patients with disabilities. Previous experience with PWDs was a positive predictor of comfort in providing care to PWDs.                                                                                                                                   |
| Castro et al. 2018 <sup>46</sup>         | Federal University of Triângulo Mineiro, Brazil                           | Undergraduate medicine, nursing, nutrition, occupational therapy, physiotherapy, and psychology students (n=12) | People with disabilities                                                     | Undergraduate health students participated in a 30-hour course that focused on the concepts and policies related to disability, experiences of disability, clinical practice, and seminar presentations. These topics were taught through lectures, movies, case studies, role-play, debates, and discussions. | x | x | x |   |   |   |  |  |   |  |  |  |                                                     | competence                                                                                                                                                                                                                                               | The intervention improved students' self-reported core competencies, particularly in communication, assessment, provider-patient relationship, practice, and knowledge of both accessibility and caring for patients with disabilities.                                                                                                 |
| Burrola-Mendez et al. 2018 <sup>47</sup> | University of Pittsburgh, USA                                             | Graduate students in rehabilitation sciences (n=6)                                                              | Wheelchair users                                                             | An 8-module online training course followed by three-day in-person training for low-bandwidth areas that increases service provision for wheelchair users.                                                                                                                                                     | x |   | x |   |   |   |  |  |   |  |  |  |                                                     | knowledge, competence                                                                                                                                                                                                                                    | Course participants had significant increases in their competency to deliver wheelchair service provisions, with an average increase of $10.84 \pm 5.42$ , $p=0.004$ .                                                                                                                                                                  |
| Salama and                               | College of                                                                | Dental students                                                                                                 |                                                                              | A 30-minute DVD presentation on providing                                                                                                                                                                                                                                                                      | x |   |   |   |   |   |  |  |   |  |  |  |                                                     | knowledge,                                                                                                                                                                                                                                               | The mean±SD score of all 150 students' (30 students                                                                                                                                                                                                                                                                                     |

|                                    |                                                           |                                                |                                                         |                                                                                                                                                                                                                                                                                                                                                |   |   |   |   |   |  |   |                                                       |                                                                                                                                                                                                                                                                                                                                                                           |
|------------------------------------|-----------------------------------------------------------|------------------------------------------------|---------------------------------------------------------|------------------------------------------------------------------------------------------------------------------------------------------------------------------------------------------------------------------------------------------------------------------------------------------------------------------------------------------------|---|---|---|---|---|--|---|-------------------------------------------------------|---------------------------------------------------------------------------------------------------------------------------------------------------------------------------------------------------------------------------------------------------------------------------------------------------------------------------------------------------------------------------|
| Al-Balkhi 2020 <sup>18</sup>       | Dentistry, King Saud University, Saudi Arabia             | (n=150)                                        | People with disabilities                                | oral care for people with disabilities.                                                                                                                                                                                                                                                                                                        |   |   |   |   |   |  |   | competence                                            | from each of the five dental levels) pre-test was 15.46±2.97, which increased to 18.09±3.37 on the post-test.                                                                                                                                                                                                                                                             |
| Mohebbi et al. 2014 <sup>48</sup>  | Tehran University of Medical Sciences, Iran               | Senior dental students (n=70)                  | People with disabilities                                | The intervention group received training on providing care for disabled patients through group discussions, lectures, and hands-on clinical fluoride varnish/screening for autistic children.                                                                                                                                                  | x |   |   | x |   |  | x | knowledge, attitudes                                  | The intervention group significantly increased their attitudes and knowledge after the intervention, even after controlling for backgrounds and experience with disability (p<0.05).                                                                                                                                                                                      |
| Bailey et al. 2021 <sup>16</sup>   | Ferris State University College of Pharmacy, USA          | First and second-year pharmacy students (n=39) | Hard of hearing and D/deaf people                       | A four-class, optional, co-curricular course was offered to pharmacy students, focusing on deaf culture, communication, and ASL. Included time to interact with a deaf physician over Skype and with deaf/HOH individuals from the community.                                                                                                  | x | x |   |   |   |  |   | confidence, communication                             | Pharmacy students had significant increases in their confidence to provide care and communicate with d/Deaf, hard of hearing individuals, and interpreters after the course.                                                                                                                                                                                              |
| Watmough et al. 2014 <sup>27</sup> | University of Liverpool, UK                               | Third year medical students (n=42)             | People with disabilities                                | A 7-week community placement for third year medical students, including six full-day, small-group sessions, a 5-day GP placement where students clerk with at least two patients with disabilities, communications skills development, and visits to community disability centers                                                              | x |   |   |   | x |  | x | knowledge, comfort                                    | Students better understood disability by participating in the program and felt that the community center visits, having patients as educators (through clinical contact), and workshops throughout the placement had significant impacts on their knowledge and comfort.                                                                                                  |
| Ahmad et al. 2020 <sup>49</sup>    | Faculty of Dentistry, Universiti Teknologi MARA, Malaysia | Undergraduate dental students (n=165)          | Children with visual impairments                        | Dental students (years 1-5) received a lecture on management of individuals with visual impairments followed by a participating in a clinic where each dental student was assigned to manage of a child with visual impairment at a special education school as part of a dedicated module.                                                    | x |   |   |   |   |  | x | knowledge, competence, behaviour, attitudes, learning | Students positively improved their knowledge, professionalism, behaviour, attitudes, and learning by participating in the clinic.                                                                                                                                                                                                                                         |
| Crane et al. 2020 <sup>50</sup>    | Ohio State University Wexner Medical Center, USA          | Third-year medical students (n=169)            | People with disabilities (mobility, sensory, cognitive) | Medical students participated in a patient encounter with a PWD where they were asked to complete a brief social and medical history.                                                                                                                                                                                                          |   |   |   |   |   |  | x | confidence, competence, and comfort                   | Students initially showed significant improvements in confidence, skills, and comfort. A year later, 35% of participants were surveyed and found these benefits were sustained in most students, though many felt the need for more training and exposure.                                                                                                                |
| Tai et al. 2018 <sup>51</sup>      | University of Melbourne, Australia                        | Final year graduate audiology students (n=15)  | Hard of hearing and D/deaf people                       | Students had a clinical encounter filmed and re-played during a clinical communication education session to see their perspectives on their clinical communication skills.                                                                                                                                                                     |   |   |   |   |   |  | x | communication                                         | Audiology students demonstrated that they were able to reflect on critical communication areas and be more attentive to patient's needs, understanding, and questions.                                                                                                                                                                                                    |
| Ozkan et al. 2020 <sup>52</sup>    | Faculty of Health Sciences, State University in Turkey    | Third-year nursing students (n=70)             | People with intellectual disabilities                   | Students participated in a clinical practice for three weeks (2.5 days per week) in 12 different fields- one of them being in a special education school. The experimental group went to a clinic that served special education schools and were exposed to case studies, nursing care examples, and videos care for people with disabilities. | x |   | x | x |   |  |   | knowledge, competence, attitudes                      | After the placement, the experimental group had higher total attitudes to people with disabilities (172.02±14.59 pre-test to 177.54±13.95 post-test) compared to the control group (176.31±16.25 pre-test to 171.97±13.69 post-test). Students also noted that they improved their attitudes, knowledge, and skills for caring for people with intellectual disabilities. |

|                                        |                                                             |                                                      |                                                            |                                                                                                                                                                                                                                                                                                                                                                                                    |   |   |   |   |   |  |  |   |                                     |                                                                                                                                                                                                                                                                                                                                                                                                                                                                                                                      |
|----------------------------------------|-------------------------------------------------------------|------------------------------------------------------|------------------------------------------------------------|----------------------------------------------------------------------------------------------------------------------------------------------------------------------------------------------------------------------------------------------------------------------------------------------------------------------------------------------------------------------------------------------------|---|---|---|---|---|--|--|---|-------------------------------------|----------------------------------------------------------------------------------------------------------------------------------------------------------------------------------------------------------------------------------------------------------------------------------------------------------------------------------------------------------------------------------------------------------------------------------------------------------------------------------------------------------------------|
| Sinai et al. 2013 <sup>53</sup>        | University College London, UK                               | Undergraduate medical students (n=387)               | People with intellectual disabilities                      | A 14-week course taught undergraduate medical students about training patients with intellectual disabilities. As part of the block, participants did a three-week specialist placement on learning disability services.                                                                                                                                                                           | x |   | x | x |   |  |  |   | knowledge, attitudes                | Students basic knowledge significantly improved after the intervention (p<0.001) and improved their attitudes, though not significantly.                                                                                                                                                                                                                                                                                                                                                                             |
| Abdi and Metcalf 2020 <sup>20</sup>    | Cardiff University, UK                                      | Fourth-year undergraduate medical students (n=110)   | People with intellectual disabilities                      | Medical students participated in a mandatory communication skills session that included case studies and simulated patients. This was run by the Speech Language Therapy team three times during the academic year.                                                                                                                                                                                | x |   | x |   | x |  |  |   | confidence, attitudes               | Mean scores improved from 115 (SD=14.5) to 122 (SD=17.2), or a mean difference of 6.92 (C.I: 4.69, 9.16), which was statistically significant. Participants also noted their confidence on treating patients with disabilities also improved.                                                                                                                                                                                                                                                                        |
| Shields et al. 2013 <sup>54</sup>      | Department of Physiotherapy, La Trobe University, Australia | First- and second-year physiotherapy students (n=17) | People with Down syndrome                                  | Students participated in a 10-week, twice weekly community placement at a gymnasium for adolescents with Down syndrome. There, participants were expected to enact a progressive resistance training program.                                                                                                                                                                                      |   |   | x |   | x |  |  |   | communication, comfort, knowledge   | Physiotherapy students improved their clinical skills, professional skills, and understanding of young people with disabilities.                                                                                                                                                                                                                                                                                                                                                                                     |
| Hensel et al. 2015 <sup>28</sup>       | University-affiliated wilderness children's camp, USA       | Junior-level BSN students (n=9)                      | Children with intellectual impairments or wheelchair users | Nursing students went to one of two weekend-long fall camps for children with disabilities aged 8-18.                                                                                                                                                                                                                                                                                              |   |   |   |   |   |  |  | x | knowledge, comfort, attitudes       | Students found the placement challenging, but overall improved their confidence and competency to provide care to children with disabilities/medical complexities. They also developed more positive attitudes towards caring for patients with disability.                                                                                                                                                                                                                                                          |
| Watkins and Colgate 2016 <sup>55</sup> | Cardiff University, UK                                      | Medical students (n=45)                              | People with intellectual disabilities                      | A self-advocacy agency, Cardiff People First, ran a one-hour video and ice breaker activity. Subsequently, students assessed a simulated patient played by an actor with an intellectual disability. Students then participated in a focus group discussions.                                                                                                                                      | x | x |   |   |   |  |  | x | knowledge, attitudes                | Students attitudes improved significantly from a mean score of 13.7 (SD=1.29) to 10.52 (SD=1.12) (a mean difference of 3.17 (95% CI=2.41-3.94), p<0.001). Knowledge also improved significantly from a mean of 14.84 pre-intervention to 10.65 post-intervention (mean difference 95%CI = 4.22(3.3-5.14), p<0.001)                                                                                                                                                                                                   |
| Forsgren et al. 2017 <sup>56</sup>     | University of Gothenburg, Sweden                            | Fourth-year medical students (n=69)                  | People with acquired communication disorders               | All students participated in a 45-minute mandatory lecture on acquired communication disorders. 36 students then participated in a 2.5-hour long workshop with a simulated patient to practice communication skills, and 15 were video recorded during the simulation pre- and post-workshop.                                                                                                      | x |   | x |   |   |  |  | x | knowledge, attitudes, communication | Students who participated in the workshop had significantly higher post-test results than students who only participated in the lecture, though all groups had knowledge and communication improvements. There was also a statistically significant increase in perceived confidence from pre-lecture (m=13) to post-lecture (m=18.9, p=0.001) as well as from pre-workshop (m=15.3) to post-workshop (m=21.9, z=5.168, p=0.001). Video recordings supportive strategies were used more significantly post-workshop. |
| McIntosh et al. 2018 <sup>57</sup>     | Ball State University School of Nursing, USA                | Senior nursing students (n=84)                       | Autism Spectrum Disorder                                   | Students were exposed to Autism through lectures, case studies, a documentary video, and description of the simulation prior to the study, which was an encounter with a standardized patient. In the encounter, a 14-year-old boy with a fractured wrist was admitted to the emergency department. Students were expected to assess the patient and associated behavioral and emotional symptoms. | x |   | x |   |   |  |  | x | knowledge, competence               | 87% of students indicated that they used communications strategies learned, while the rest remained neutral. 86% also thought the supplemental information provided ahead of time supported their learning. Overall, the simulation and pre-requisite classroom instruction improved their knowledge of ASD.                                                                                                                                                                                                         |

|                                        |                                                                            |                                                                                                                |                                                             |                                                                                                                                                                                                                                                                                                                                                                                                                                                                                                                           |   |   |   |   |   |   |                                               |                                                                                                                                                                                                                                                                                                                                                                                                                                                                                                                     |
|----------------------------------------|----------------------------------------------------------------------------|----------------------------------------------------------------------------------------------------------------|-------------------------------------------------------------|---------------------------------------------------------------------------------------------------------------------------------------------------------------------------------------------------------------------------------------------------------------------------------------------------------------------------------------------------------------------------------------------------------------------------------------------------------------------------------------------------------------------------|---|---|---|---|---|---|-----------------------------------------------|---------------------------------------------------------------------------------------------------------------------------------------------------------------------------------------------------------------------------------------------------------------------------------------------------------------------------------------------------------------------------------------------------------------------------------------------------------------------------------------------------------------------|
| Woodard et al. 2012 <sup>58</sup>      | University of South Florida Health, Morsani College of Medicine (USF), USA | Primary care clerkship for third-year undergraduate medical students (n=245)                                   | People with physical, sensory, or intellectual disabilities | Students participated in a 12-week Primary Care and Special Populations clerkship that included a special 6-week module on disability, half-day classroom sessions, online modules, and community site visits twice a week. Classroom sessions included simulations, case studies, and communication and exam technique advice from individuals with disabilities.                                                                                                                                                        | x | x | x | x | x | x | knowledge, competence, comfort                | Students significantly improved their knowledge of, attitudes, and comfort of working with people with disabilities by a mean score of 2.36, 4.20, and 15.00, respectively, after completing the clerkship program (p<0.001 for all).                                                                                                                                                                                                                                                                               |
| Jones et al. 2015 <sup>59</sup>        | Queen's University, Canada                                                 | Medicine (n=100), nursing (n=93), clinical psychology (n=6), and rehabilitation students (n=133) (total n=332) | People with intellectual disabilities                       | Students participated in a three-part course that consisted of an e-learning and case models pre-requisite prior to a day-long course that consisted of group lectures, multidisciplinary experiential learning, and inter-professional team-based learning.                                                                                                                                                                                                                                                              | x | x | x |   |   |   | knowledge, competence, attitudes              | Across all disciplines, there was a significant difference (p<0.01) in mean percentage correct between pre-course (M=0.64, SD=0.25) and post-course (M=0.70, SD=0.25) skills scores, of which nurses had the most significant improvements. Knowledge improved pre-course (M=0.51, SD=0.22) and post-course (M=0.64, SD=0.23) significantly (p<0.01), though this was independently significant for medical, rehabilitation, and nursing students. There were no statistically significant differences in attitude. |
| Beverly and Wooster 2018 <sup>60</sup> | University of South Alabama, USA                                           | Speech language pathology, occupational therapy, and physiotherapy graduate students(n=9)                      | Autism Spectrum Disorder                                    | A one-credit online course and day-long conference included lectures, panel discussions, group problem solving, and parent perspectives. Content was focused on inter-professional education and diagnosis and co-morbidities of ASD.                                                                                                                                                                                                                                                                                     | x |   | x |   |   |   | knowledge, competence, attitudes              | There were significant increases in participants basic ASD knowledge after the course (p<0.05). Participants were more aware of their role and that of their team members in the screening and assessment of ASD.                                                                                                                                                                                                                                                                                                   |
| Coret et al. 2018 <sup>61</sup>        | Michael G. Degroote School of Medicine, McMaster University, Canada        | First-year medical students (n=27)                                                                             | Intellectual/developmental disabilities (IDD)               | Control and intervention groups participated in a baseline introductory video about healthcare and communication skills. After the video, the intervention group were shown videos of individuals and families of individuals with IDD who spoke about their lives, challenges, and perspectives on health care and participated in a reflective activity. Controls were only given a post-intro video quiz. Both groups participated in four clinical encounters and their skills were assessed by a final-year student. | x |   |   |   |   | x | comfort, confidence, and competence           | Students communication skills assessment mean rating scores were higher for students in the narrative group relative to the control group for self-ratings mean [SD] 4.49 [0.73] vs. 4.37 [0.69]), patient educator ratings(5.43 [0.52] vs. 5.33 [0.76]), and senior medical students(5.01 [0.69] vs. 4.75 [0.79]). Similarly, students' qualitative evaluations demonstrated improved communication, comfort, confidence, adaptability, and learning from the methods used in the intervention group.              |
| Jain et al. 2013 <sup>62</sup>         | Department of Family Medicine, Lehigh Valley Health Network, USA           | Third- and fourth-year medical students (n=44)                                                                 | Wheelchair users                                            | Two patients with disabilities were trained to teach medical students about disability. In an hour-long session, they described their daily routines and experiences interacting with health care for medical students, followed by Q and A. Students who participated in the session were asked questions about awareness, sensitivity, and competency.                                                                                                                                                                  | x | x |   |   |   |   | comfort, knowledge, competency, communication | Respondents qualitative responses suggested greater competency and awareness and sensitivity after the intervention, particularly since prior to the training 89% felt uncomfortable interacting with patients with disabilities. Overall, 98% stated the program was beneficial.                                                                                                                                                                                                                                   |
| Karl et al.                            | University at                                                              | Third-year                                                                                                     |                                                             | Third-year medical students participating in                                                                                                                                                                                                                                                                                                                                                                                                                                                                              |   |   |   |   |   | x | communication,                                | Students felt that the encounter highlighted gaps in                                                                                                                                                                                                                                                                                                                                                                                                                                                                |

|                                   |                                                         |                                                                                                  |                                                                          |                                                                                                                                                                                                                                                                                                                                                                                                                                            |   |   |   |   |  |  |  |  |  |                                                     |                                                                                                                                                                                                                                                                                                                                                                                                                                                    |
|-----------------------------------|---------------------------------------------------------|--------------------------------------------------------------------------------------------------|--------------------------------------------------------------------------|--------------------------------------------------------------------------------------------------------------------------------------------------------------------------------------------------------------------------------------------------------------------------------------------------------------------------------------------------------------------------------------------------------------------------------------------|---|---|---|---|--|--|--|--|--|-----------------------------------------------------|----------------------------------------------------------------------------------------------------------------------------------------------------------------------------------------------------------------------------------------------------------------------------------------------------------------------------------------------------------------------------------------------------------------------------------------------------|
| 2013 <sup>63</sup>                | Buffalo School of Medicine and Biomedical Sciences, USA | medical students (n=144)                                                                         | People with disabilities (mostly people with developmental disabilities) | a family medicine clerkship program engaged in a day-long clinical experience at a family practice serving people with disabilities. Students observed and assisted the staff and then were asked to write a reflection. Students had previously done lectures, small group encounters of people with disabilities and their families, and other workshops.                                                                                |   |   |   |   |  |  |  |  |  | comfort, attitudes, knowledge                       | communication skills, as well as increasing comfort in caring for people with disabilities. The program also highlighted quality and standard of care issues for people with disabilities and that ones' disability can wrongly be attributed as the cause of the issue, when it's not. Students also noted issues with the organizational structure of the medical facility and environmental and technical accommodations necessary for support. |
| Thomas et al. 2014 <sup>64</sup>  | University College London, UK                           | 4th year undergraduate medical students (n=47)                                                   | People with intellectual disabilities                                    | All participants had attended a 3-hour lecture on ID, session by a speech and language therapist, group work, watching a communication DVD, and basic Makaton training (a simplified British Sign Language). The second session involved students rotating through four stations in groups of four to work with simulated patients with ID.                                                                                                | x |   |   |   |  |  |  |  |  | competence, comfort, communication                  | There was significant improvement in medical students' perceived skills (p=0.002), comfort level (p=0.004), and type of clinical approach (p=0.003) in managing patients with no disability. Furthermore, significantly improved scores for all three factors were obtained by medical students regarding patients with mild and severe disability levels (p<0.001), with even greater benefits for managing severe disabilities compared to mild. |
| Saldert et al. 2016 <sup>31</sup> | University of Gothenburg, Sweden                        | Medical students (n=59, 33 only lecture, 26 lecture & workshop)                                  | People with speech language disorders                                    | Students attended a 45 min mandatory lecture on different forms of speech disorders. A subset of students attended a mandatory 2.5-hour mixed format workshop two weeks later, led by speech language pathologists, involving role play, a lecture on communication strategies, and discussions.                                                                                                                                           | x |   | x |   |  |  |  |  |  | knowledge, confidence, competence, attitudes        | Students from both the lecture and the workshop reported significantly increased knowledge (p=0.001) and how to support communication in speech-language disorders. Only the workshop group also displayed a statistically significant increase in ability to suggest suitable communications strategies (p=0.001) and change in attitudes (p=0.001).                                                                                              |
| Baylor et al. 2019 <sup>65</sup>  | University of Washington, USA                           | Second-year medical students (n=224)                                                             | People with communication disorders                                      | Students received the FRAME training, which looks at five key areas of communication skills, including familiarizing patient communication preferences, reducing rate, assisting patients, mixing methods, and respecting autonomy. Students participated in a 20-minute module on key characteristics of communications disorders, a 2-hour in-person session and practice strategies and simulated patients with aphasia and dysarthria. | x |   |   |   |  |  |  |  |  | knowledge, self-efficacy, communication, confidence | Knowledge scores significantly increased from a mean of 4.96 pre-training (SD=1.1) to 7.23 post-training (SD=1.8) (p=0.000), while self-efficacy improved significantly across all measures (p=0.000). Students also significantly improved their communications skills, particularly in diagnosing and familiarizing with patient communication preferences (except for reducing rate in the dysarthria scenario).                                |
| Lynch et al. 2019 <sup>21</sup>   | Medical School in Ireland                               | Undergraduate, graduate entry, and international medical students in second or third year(n=320) | People with disabilities                                                 | Students taking a mandatory 12 week 'Understanding Disability' module in their course. This involved weekly lectures, applied anatomy laboratory sessions, a day visit to a national rehabilitation hospital, practice taking patient history in rehabilitation programs, and case studies.                                                                                                                                                | x | x | x | x |  |  |  |  |  | competency, attitude                                | An overall positive effect across the module was observed with significantly improved measurements from pre-intervention to post-intervention across the 4 variables, anxiety (p<0.0125), attitude and competency (p<0.001), and empathy (p=0.03).                                                                                                                                                                                                 |

|                                          |                                              |                                                                                        |                                                              |                                                                                                                                                                                                                                                                                                                                                                                                                                                                                |   |   |  |  |  |  |  |  |  |  |  |                                  |                                                                                                                                                                                                                                                                                                                                                                                                                                                                                                                                                                              |                                                                                                                                                                                                                                                                                                                                                                                                                                                   |
|------------------------------------------|----------------------------------------------|----------------------------------------------------------------------------------------|--------------------------------------------------------------|--------------------------------------------------------------------------------------------------------------------------------------------------------------------------------------------------------------------------------------------------------------------------------------------------------------------------------------------------------------------------------------------------------------------------------------------------------------------------------|---|---|--|--|--|--|--|--|--|--|--|----------------------------------|------------------------------------------------------------------------------------------------------------------------------------------------------------------------------------------------------------------------------------------------------------------------------------------------------------------------------------------------------------------------------------------------------------------------------------------------------------------------------------------------------------------------------------------------------------------------------|---------------------------------------------------------------------------------------------------------------------------------------------------------------------------------------------------------------------------------------------------------------------------------------------------------------------------------------------------------------------------------------------------------------------------------------------------|
| Garavatti et al. 2018 <sup>35</sup>      | University of Central Florida, USA           | 2nd year medical student (n=20), final year Doctor of Physical Therapy Students (n=20) | People with disabilities                                     | Medical and physical therapy students in the intervention group went through an interprofessional education (IPE) clinical experience that included an encounter with a disabled patient. 20 students attended a 3.5-hour IPE clinical session, focused on knowledge and interacting with individuals with disabilities through an orientation, performing a neurological examination, and group discussion. The control group (n=20) did not attend the IPE clinical session. | x |   |  |  |  |  |  |  |  |  |  | knowledge, attitudes, competence | Before the intervention, interactions of disabled persons was significantly higher in the experimental group and higher in medical students. Pre and posttest scores for the intervention group revealed a statistically significant (p<0.001), with improved comfort levels in 5 of 6 subscales. However, mean scores did not differ significantly between control and experimental groups (p>0.05). Both medical and physical therapy students reported greater comfort levels and perception attitudes in working with patients with disabilities after the intervention. |                                                                                                                                                                                                                                                                                                                                                                                                                                                   |
| Saunders and Berridge 2015 <sup>66</sup> | City University London, UK                   | Undergraduate and post-graduate adult, child, and mental health nurses (n=182)         | People with intellectual disabilities                        | Nursing students participated in a 3-hour session on education around people with intellectual disabilities. This involved 'Shareville', a virtual simulation/software allowing for navigation of real-life scenarios of individuals with disabilities. Group discussions occurred prior to and after Shareville utilization.                                                                                                                                                  | x |   |  |  |  |  |  |  |  |  |  |                                  | knowledge, confidence                                                                                                                                                                                                                                                                                                                                                                                                                                                                                                                                                        | Students reported that the Shareville scenarios were sufficiently real and generally had a positive evaluation, citing improved confidence, knowledge, clinical practice, and decision making. Lecturers identified strengths in the blended learning and collaborative teaching approach.                                                                                                                                                        |
| Sheepway et al. 2014 <sup>30</sup>       | Faculty of health sciences, Australia        | Third year undergraduate speech-language pathology students (n=73)                     | People with communication impairments                        | Third year speech language pathology students participated in three clinical placements to develop clinical competency over 12 months. The intervention sought to examine the impact of the sequence of placements, setting, and intensity of placements.                                                                                                                                                                                                                      |   |   |  |  |  |  |  |  |  |  |  |                                  | competence                                                                                                                                                                                                                                                                                                                                                                                                                                                                                                                                                                   | Students performed better on the 11 competencies measured in COMPASS with each subsequent clinical encounter. Mean competency scores for placement 1 400.96 (SD=57.404), placement 2 451.55 (SD=81.116), and placement 3 510.53 (SD=92.874). Students in child placements were found to achieve greater growth in overall competency than those in adult placements.                                                                              |
| Steedman et al. 2012 <sup>19</sup>       | Queen's University, Canada                   | Second year medical students (n=25)                                                    | People with visual impairments                               | Students were split into two groups and watched either a multimedia learning tools (MMLTs) and read a textbook excerpt, covering different topics (Acute visual loss vs cataracts), followed by the other method.                                                                                                                                                                                                                                                              | x |   |  |  |  |  |  |  |  |  |  |                                  | knowledge                                                                                                                                                                                                                                                                                                                                                                                                                                                                                                                                                                    | There was no significant difference in student performance between MMLT and textbook excerpt for either visual loss or cataract, however the MMLT cataract group did get higher knowledge scores (mean 75% vs. 61%, p=0.201).                                                                                                                                                                                                                     |
| Dyer et al. 2014 <sup>67</sup>           | East Midlands, UK                            | First and second year nursing students (n=138)                                         | People with disabilities                                     | Students watched a 30 minute 'Sexual Respect' DVD to educate on the types of sexual problems individuals with disabilities face, tips on initiating the conversation about sex with patients as well as self-help and peer support groups that patients can be directed to. Clinicians and people with disabilities are featured in the video.                                                                                                                                 | x | x |  |  |  |  |  |  |  |  |  |                                  | knowledge, confidence, attitudes, competence                                                                                                                                                                                                                                                                                                                                                                                                                                                                                                                                 | Students had significantly greater scores in knowledge, confidence, comfort, and willingness after watched the DVD compared to baseline and pre-DVD (p<0.001), with no significant difference between post-DVD and the 2 week follow up (except for comfort, which was statistically significant). Lack of knowledge was cited as the most common barrier to discussing sex with patients (48%) but found that the training made it easier (64%). |
| Provident and Colmer 2013 <sup>68</sup>  | Camp Kon-o-Kwee/Spencer in Pennsylvania, USA | Level I fieldwork Occupational therapy students (n=37)                                 | Children with muscular dystrophy and related muscle diseases | Students participated in a weeklong summer camp for campers who have muscular dystrophy or related muscle diseases. Students interviewed families on medical care, shadowed nurses, and assisted with daily routines, transfers, and other counsellor duties, as necessary.                                                                                                                                                                                                    |   |   |  |  |  |  |  |  |  |  |  |                                  | knowledge, confidence, comfort                                                                                                                                                                                                                                                                                                                                                                                                                                                                                                                                               | Students improved their average comfort rating from 4.5/10 on day 1 to 9.18 on the last day. Students also qualitatively identified that they improved their skills, knowledge, relationships, understanding of caregivers and documentation, and comfort in providing care to people with muscular dystrophy.                                                                                                                                    |

|                                                            |                                                   |                                                                                                                                       |                                                    |                                                                                                                                                                                                                                                                                                                                                                                                       |   |  |   |   |   |  |   |                                                  |                                                                                                                                                                                                                                                                                                                                                                                                                                                                                                                                                                                                                |
|------------------------------------------------------------|---------------------------------------------------|---------------------------------------------------------------------------------------------------------------------------------------|----------------------------------------------------|-------------------------------------------------------------------------------------------------------------------------------------------------------------------------------------------------------------------------------------------------------------------------------------------------------------------------------------------------------------------------------------------------------|---|--|---|---|---|--|---|--------------------------------------------------|----------------------------------------------------------------------------------------------------------------------------------------------------------------------------------------------------------------------------------------------------------------------------------------------------------------------------------------------------------------------------------------------------------------------------------------------------------------------------------------------------------------------------------------------------------------------------------------------------------------|
| Adib-Hajbaghery and Rezaei-Shahsavarloo 2015 <sup>69</sup> | Kashan University of Medical Sciences, Iran       | Final year nursing students (n=71)                                                                                                    | Hard of hearing and D/deaf people                  | Nursing students participated in two clinical simulations with D/deaf and hard of hearing patients to improve knowledge and performance and confidence in supporting hearing impaired individuals.                                                                                                                                                                                                    |   |  |   |   |   |  | x | knowledge, competence                            | 61.5% of students had low-very low levels of knowledge and 87.3% had weak to very weak performance in communicating with D/deaf and hard of hearing patients. There was a significant correlation between the mean knowledge scores and the students' performance in the simulation. No students had knowledge of Persian sign language, but some (11.3%) had a history of caring for a patient with hearing impairment.                                                                                                                                                                                       |
| VandeWaa et al. 2019 <sup>29</sup>                         | University of South Alabama, USA                  | Graduate-level audiology (n=24), undergraduate nursing (n=53), graduate-level speech language pathology (n=24) students (total n=101) | Speech or D/deaf and hard of hearing people        | Students completed online training one week prior to a simulation, which used enhanced interprofessional education (Sim-IPE). During the simulation, students worked in groups of 3 (one from each field) and completed 4 scenarios related to medication side effects with simulated patients. The emphasis was on teamwork of the group with emphasis on effective patient communication.           | x |  |   |   |   |  | x | knowledge, competence                            | Students from all 3 disciplines were found to score higher in knowledge of medications that impact communication after the intervention compared to before. The average pretest score across the disciplines was 5.48 (SD=1.53) which significantly (p<0.001) increased to 6.39 (SD=1.29). Overall students' impressions were positive with improved healthcare team communication.                                                                                                                                                                                                                            |
| Tate et al. 2020 <sup>70</sup>                             | The Ohio State University College of Nursing, USA | Second-year nursing students (n=161)                                                                                                  | People with communication impairments              | Nursing students took part in the StudentSPEACS program which involved a 1 hr. online training component to improve communications skills, followed by a 1.5 hr. in class lecture on assessing communication abilities and strategies, and then a 1.5hr clinical simulation.                                                                                                                          | x |  |   |   |   |  | x | attitudes, competency                            | Students reported improved communication skills after the training, on average, and 98% of students reported using StudentSPEACS in the clinical setting.                                                                                                                                                                                                                                                                                                                                                                                                                                                      |
| Theoret et al. 2020 <sup>71</sup>                          | Rutgers University, USA                           | Medical students (n=56, 19 members and 37 non-members)                                                                                | people with intellectual and physical disabilities | Students that are members of the Involvement with Disability Education and Advancement (IDEA) partnered with a local middle/high school for students with intellectual and physical disabilities. Students conducted health related workshops (including sexual education) in the classroom and did arts, crafts, and exercise programs to increase independence, confidence, and self-efficacy.      |   |  |   |   |   |  | x | confidence                                       | Regardless of IDEA membership, medical students of all year perceived themselves to be more comfortable caring for physically disabled than students with intellectual disabilities or non-verbal patients after participating in the program. A higher percentage of IDEA members answered with a higher comfort level of 5 or greater when indicating comfort with eliciting information from patients with intellectual disabilities compared to non-members (89.5% vs 59.5%, p=0.0207). Conversely, non-members had higher comfort providing care to patients with physical disabilities than non-members. |
| Watters et al. 2015 <sup>72</sup>                          | New York University College of Dentistry, USA     | Fourth year dental students (n=364)                                                                                                   | people with disabilities                           | Students participated in instruction before each clinic session for an hour and a half and were assigned articles and case studies. Students participated in a 4-6-week rotation (half days) in the special needs clinic in groups of seven to nine students. Students took turns providing care and serving as dental assistants to practice skills, improve comfort, and self-efficacy of students. | x |  | x | x | x |  |   | competency, confidence, self-efficacy, attitudes | Students reported greater confidence in treating people with intellectual disabilities and medical complexities, (p<0.001). Furthermore, the students agreed less (2.6, SD=1) than before (3, SD=1.1) the rotation that people with disabilities care less about their oral health p<0.001. People with less previous experience showed the greatest improvement when dealing with medically complex patients.                                                                                                                                                                                                 |

|                                         |                                                                 |                                                         |                                       |                                                                                                                                                                                                                                                                                                                                                                                                                                  |   |   |   |  |  |  |  |  |  |                                                  |                                                                                                                                                                                                                                                                                                                                                                                                                                                                                                                |
|-----------------------------------------|-----------------------------------------------------------------|---------------------------------------------------------|---------------------------------------|----------------------------------------------------------------------------------------------------------------------------------------------------------------------------------------------------------------------------------------------------------------------------------------------------------------------------------------------------------------------------------------------------------------------------------|---|---|---|--|--|--|--|--|--|--------------------------------------------------|----------------------------------------------------------------------------------------------------------------------------------------------------------------------------------------------------------------------------------------------------------------------------------------------------------------------------------------------------------------------------------------------------------------------------------------------------------------------------------------------------------------|
| Vento-Wilson et al. 2015 <sup>73</sup>  | Large Urban University in Southern California, USA              | Nursing students (n=103)                                | People with communication impairments | Principal investigator conducted a 1 hr. course to train student nurses on Augmentative and Alternative communication strategies (AAC) to improve communication with patients who have severe communication deficits (SCDs).                                                                                                                                                                                                     | x |   |   |  |  |  |  |  |  | knowledge, confidence, competence                | After the AAC training, students felt more confident in utilizing the tools (p<0.01), with 90% feeling some level of confidence and 42 % feeling very confident compared to 7% before. From the follow-up, 30 students reported using all 4 AAC techniques taught. Students who participated reported that the techniques were new to them and were helpful in improving communication with patients with SCDs.                                                                                                |
| Kirshblum et al. 2020 <sup>74</sup>     | Rutgers Medical School, USA                                     | First-year medical students (n=355)                     | People with physical disabilities     | The training on caring for people with physical disabilities was part of the two-year Health Equity and Social Justice curriculum. The program discussed prevalence, issues with accessible health care and health status, skills to improve care, and perspectives of people with physical disabilities. The course included a lecture, video vignette discussion (2nd year only), and patient panel to illustrate disparities. | x | x |   |  |  |  |  |  |  | knowledge, comfort                               | Students' knowledge and comfort improved compared to baseline. For knowledge, there was significantly increased awareness around different treatment, homogeneity of the population, health status, appropriate interaction with service dogs to initiate encounter, and legal instruments. For comfort, the initial pre-survey responses were nearly split between negative and positive (169 vs 174), there was a 35% increase (50.7%-85.8%) in positive responses between the pre-to post-surveys (p<0.05). |
| <b>IN SERVICE</b>                       |                                                                 |                                                         |                                       |                                                                                                                                                                                                                                                                                                                                                                                                                                  |   |   |   |  |  |  |  |  |  |                                                  |                                                                                                                                                                                                                                                                                                                                                                                                                                                                                                                |
| Read and Rushton 2013 <sup>75</sup>     | University Hospital of North Staffordshire, UK                  | Nurses and other allied health professionals (n =157)   | People with intellectual disabilities | A year-long intervention included a series of 8 workshops and a toolkit. The workshops were led by clinicians and people with ID to teach about admission, assessment, discharge planning, and values and attitudes regarding ID. The toolkit included a resource directory, assessment tool, DVD, posters, communication book, cue cards, and leaflets about good practices to support people with intellectual disabilities.   | x | x | x |  |  |  |  |  |  | knowledge, competence, attitudes                 | Pre- and post-intervention scores show significant improvement in knowledge, skills, and attitudes (mean score of 36.50 pre-intervention increased to 42.12 post-intervention; p<0.0001).                                                                                                                                                                                                                                                                                                                      |
| Major et al. 2013 <sup>76</sup>         | 33 academic programs across the United States                   | Pediatric and medicine-pediatric residents (n=114)      | Autism spectrum disorder              | A trial piloting 7 case-based modules on 1) early warning signs, 2) Screening, 3) Communication, 4) Diagnosis, 3) Early Intervention and Education, 6) Treatment, and 7) Anticipatory Guidance at 33 different sites across the US. Each site offered one of the 7 modules.                                                                                                                                                      | x |   | x |  |  |  |  |  |  | knowledge, communication, confidence, competence | Participants attitudes improved and knowledge improved significantly (58.6% pre-test to 75.3% post-intervention, a 16.7% improvement, p<0.001). Participants self-assessment of confidence and communication also improved significantly (the mean pre-test score was 2.26 on a 4-point Likert scale (1=poor,4=excellent) to a mean of 3.08 post-test, p<0.001)                                                                                                                                                |
| Tuffrey-Wijne et al. 2017 <sup>77</sup> | Residential homes for people with intellectual disabilities, UK | Staff in residential/support ed living services (n=114) | People with intellectual disabilities | Three-day course consisting of World Café sessions (w/case studies), presentations, feedback from people with intellectual disabilities, and a teaching expert on discussing death and dying.                                                                                                                                                                                                                                    | x | x | x |  |  |  |  |  |  | competence, confidence, communication            | Participants valued the opportunity to hear the perspectives of people with intellectual disabilities and the World Café, which provided an opportunity to discuss case studies. Students improved their knowledge, skills, and confidence on communicating about death and dying, which was sustained at 3-months post-intervention.                                                                                                                                                                          |
| Chiang et al. 2013 <sup>26</sup>        | Two public hospitals in Taiwan                                  | Licensed nursing staff (n=62)                           | People with                           | Nurses watched multi-media interactive DVD to improve knowledge and assessment skills. Controls were assigned conventional classroom education on disability                                                                                                                                                                                                                                                                     | x |   | x |  |  |  |  |  |  | knowledge, competence                            | Participants had significantly improved assessment skills and greater knowledge than the experimental group that was sustained at follow-up assessments (p<0.001).                                                                                                                                                                                                                                                                                                                                             |



|                                            |                                                                                                  |                                                                                                                      | disabilities                                            | assessment.                                                                                                                                                                                                                                                                                                                                                                                                                                |   |  |  |  |  |  |  |  |  |  |  |  |  |                                   |                                                                                                                                                                                                                                                                                                                                                                                                                                                         |                                                                                                                                                                                                                                                                                                                                                                                                                 |
|--------------------------------------------|--------------------------------------------------------------------------------------------------|----------------------------------------------------------------------------------------------------------------------|---------------------------------------------------------|--------------------------------------------------------------------------------------------------------------------------------------------------------------------------------------------------------------------------------------------------------------------------------------------------------------------------------------------------------------------------------------------------------------------------------------------|---|--|--|--|--|--|--|--|--|--|--|--|--|-----------------------------------|---------------------------------------------------------------------------------------------------------------------------------------------------------------------------------------------------------------------------------------------------------------------------------------------------------------------------------------------------------------------------------------------------------------------------------------------------------|-----------------------------------------------------------------------------------------------------------------------------------------------------------------------------------------------------------------------------------------------------------------------------------------------------------------------------------------------------------------------------------------------------------------|
| Toro et al. 2017 <sup>78</sup>             | University of Pittsburgh, USA                                                                    | 61 total participants including clinicians (n=20), manual wheelchair users (n=20), and power wheelchair users (n=21) | Wheelchair users                                        | A wheelchair maintenance training program was developed to improve knowledge in both clinicians and wheelchair users. The clinicians training was a one-day program, and the user training was a two-day program that provided information, simulations, and hands-on experience for wheelchair maintenance.                                                                                                                               | x |  |  |  |  |  |  |  |  |  |  |  |  | knowledge, competence             | Clinicians participating in this training had a significant increase in knowledge (mean improvement of 25 points (manual wheelchair), 21.9 (power wheelchair), 27.3 (multiple choice), and 51.6 (capacity). The Performance score at pre-training was 11%, suggesting that training wheelchair users in wheelchair maintenance is uncommon.                                                                                                             |                                                                                                                                                                                                                                                                                                                                                                                                                 |
| Keisling et al. 2017 <sup>32</sup>         | Boling Centre for Developmental Disabilities, University of Tennessee Health Science Center, USA | Medicine and Medicine/Paediatrics Residents (n=203)                                                                  | People with developmental disabilities                  | Residents participated in a 1) home visit, 2) interview with an agency director/advocate and a parent who has a child with special health care needs (discuss affect children chronic illness history), and 3) Grand Rounds presentation to better understand the health care needs of this population. Residents undergo this training ('Project DOCC, Delivery of Chronic Care) during the Developmental-Behavioral Pediatrics rotation. | x |  |  |  |  |  |  |  |  |  |  |  |  | knowledge, empathy, collaboration | The program impacted residents' family collaboration, resource coordination, and integrated home care. Most significantly, participants knowledge had a lasting impact on their subsequent medical practice, including in engaging with the disability community (24%), initiating conversations with parents on disability (62.1%), and including home visit lessons into daily practice.                                                              |                                                                                                                                                                                                                                                                                                                                                                                                                 |
| Bogetz et al. 2015 <sup>79</sup>           | Stanford University, USA                                                                         | Paediatric residents (n=48)                                                                                          | Children with special health care needs (CSHCN)         | Residents participated in the Special Care Optimization for Patients and Education (SCOPE) program over four or more months. The program consists of home visits, monthly communication, and participation in a case-based discussion. In addition, residents had to go through a toolkit, which included how to review a patient's goals, a contact tree for care issues, plan of care, and home visit summary resources.                 |   |  |  |  |  |  |  |  |  |  |  |  |  | self-efficacy, attitudes          | Intervention participants had greater self-efficacy improvements in 6 of 9 domains, including understanding the child in their home context (2.47 vs 3.76, P<0.001), planning care (2.82 vs 4, P<0.001), and helping navigate health (2.82 vs 4.12, P<0.001) and community care settings (2.71 vs 3.82, P=0.001). Participants also improved in attitudinal domains and demonstrated (qualitatively) the challenges CSHCN and their families deal with. |                                                                                                                                                                                                                                                                                                                                                                                                                 |
| Casson et al. 2019 <sup>80</sup>           | Queen's University, Canada                                                                       | Family medicine residents (n=100)                                                                                    | People with intellectual and developmental disabilities | The program includes clinical encounters with patients with intellectual and developmental disabilities to improve core competencies of caring for patients with intellectual and developmental disabilities. Residents were asked to share their field notes and reflect on clinical encounters.                                                                                                                                          |   |  |  |  |  |  |  |  |  |  |  |  |  | x                                 | competence, confidence, communication                                                                                                                                                                                                                                                                                                                                                                                                                   | Students felt their exposure to people with intellectual and developmental disabilities revealed greater competency in communication, awareness of ethical considerations, access to care, and other core competencies. In particular, the program showed participants the needs of this population, how to improve communication, and empathy towards people with intellectual and developmental disabilities. |
| <b>CONTINUING PROFESSIONAL DEVELOPMENT</b> |                                                                                                  |                                                                                                                      |                                                         |                                                                                                                                                                                                                                                                                                                                                                                                                                            |   |  |  |  |  |  |  |  |  |  |  |  |  |                                   |                                                                                                                                                                                                                                                                                                                                                                                                                                                         |                                                                                                                                                                                                                                                                                                                                                                                                                 |
| McGonigle et al 2014 <sup>81</sup>         | Pennsylvania, USA                                                                                | Emergency department staff and emergency service providers (n=110)                                                   | Autism spectrum disorders                               | Participants attended of three structured sessions for emergency medical services and emergency department staff to improve confidence, knowledge, and awareness of patients with ASD. All sessions included a DVD, case studies, and manual.                                                                                                                                                                                              | x |  |  |  |  |  |  |  |  |  |  |  |  | x                                 | knowledge, comfort                                                                                                                                                                                                                                                                                                                                                                                                                                      | Participants significantly increased their knowledge and comfort providing care to emergency department patients with ASD after the intervention (p<0.05), even when prior knowledge was accounted for.                                                                                                                                                                                                         |

|                                      |                                                                              |                                                                                                      |                                        |                                                                                                                                                                                                                                                                                                                                                                            |   |   |   |  |   |   |   |                                                        |                                                                                                                                                                                                                                                                                                                                                                                                                                                                             |
|--------------------------------------|------------------------------------------------------------------------------|------------------------------------------------------------------------------------------------------|----------------------------------------|----------------------------------------------------------------------------------------------------------------------------------------------------------------------------------------------------------------------------------------------------------------------------------------------------------------------------------------------------------------------------|---|---|---|--|---|---|---|--------------------------------------------------------|-----------------------------------------------------------------------------------------------------------------------------------------------------------------------------------------------------------------------------------------------------------------------------------------------------------------------------------------------------------------------------------------------------------------------------------------------------------------------------|
| Doyle and Bennett 2014 <sup>82</sup> | Pacific Northwest, USA                                                       | Occupational therapists (n=19)                                                                       | People with physical disabilities      | An 8-hour workshop for occupational therapists to improve upper-limb post-stroke sensory impairments.                                                                                                                                                                                                                                                                      | x |   |   |  |   |   |   | knowledge, attitudes, competence                       | Knowledge, attitudes, client-centered care, and intended application of skills acquired at the workshop significantly improved compared to pre-test scores.                                                                                                                                                                                                                                                                                                                 |
| Dunleavy et al. 2018 <sup>83</sup>   | Two settings: a central urban region and a southern, more rural part, Rwanda | Physiotherapists (n=69)                                                                              | People with disabilities               | Six courses were developed to build clinical skills, improve decision making and evaluation, and treatment techniques for various orthopedic, neurologic, pediatric, and respiratory conditions, as well as leadership and advocacy. These were offered to physiotherapists in over multiple weekends in the central urban region and a southern, more rural part.         | x |   | x |  | x | x |   | quality, competence                                    | Participants thought they improved the quality of their physiotherapy care (mean 6.4 SD 1.5, scale of 0–10/10 with 0/10 not at all, 5/10 some, 10/10 great deal), particularly in treating people with disabilities (mean 7.8 SD 1.5). Overall, their skills improved across the clinical domains (decision making, treatment, functional activities, improvement goals, functional activities, outcome measurement, and adjusting treatment plans) (average 8/10 for all). |
| Mazurek et al. 2020 <sup>24</sup>    | Various medical clinics across the USA                                       | Primary care providers (n=16)                                                                        | Autism spectrum disorders              | Primary care providers attended 12 weekly one-hour video-conference sessions taught by interdisciplinary experts to improve knowledge and care for people with ASD.                                                                                                                                                                                                        | x | x | x |  |   |   | x | knowledge, self-efficacy, competence                   | Overall, participants improved self-efficacy in caring for patients pre-training (M = 181.9, SD = 54.0) to post-training (M = 210.5, SD = 38.9; Z = -2.93, p = 0.003) across all domains. They also improved overall knowledge (as assessed by the Knowledge Quiz) from pre-training (M=67.3%, SD= 11.5%) to post-training (M= 71.9%, SD=12.6%; Z= -1.79, p= 0.074).                                                                                                        |
| Mazurek et al. 2020 <sup>84</sup>    | 10 academic medical centers in the USA and Canada                            | Primary care providers who provide care to children and to an underserved population (n=117)         | Autism spectrum disorder               | Over 6 months, 10 academic medical centers participated in a randomized control trial of 12 two-hour long training from interdisciplinary Autism experts through didactic presentations, PCP-generated case presentations, and group discussions.                                                                                                                          | x |   | x |  |   |   |   | competence, knowledge, self-efficacy, barriers to care | Over 6 months, there was an increase in autism screening rates from 65% (95% CI, 40%-84%) to 71% (95% CI, 52%-84%) (P= .63) and a small 6-month decrease in mean percentage of comorbidities addressed from 81% (95% CI, 67%-90%) to 77% (95% CI, 66%-86%) (P= .59). Participants also increased their knowledge and overall self-efficacy (9% increase; 95% CI, 4%-13%; P< .001) and (29% increase; 95% CI, 25%-32%; P< .001), respectively, even in follow-up.            |
| Locke et al. 2019 <sup>85</sup>      | University of Antananarivo, Madagascar                                       | Doctors participating in a rehabilitation medicine diploma program (n=8) and physiotherapists (n=10) | People with physical disabilities      | A 400-hour rehabilitation medicine program was developed in collaboration with the University of Leeds and offered in three sections: general principles of rehabilitation, neurological condition rehabilitation, and musculoskeletal condition rehabilitation. Participants were recruited from different national and regional hospitals to participate in the program. | x |   |   |  |   |   |   | knowledge, improved care                               | Doctors who participated in the program had significantly improved confidence and competency for care. Given the limited number of trained rehabilitation practitioner, the program also increased the number of trained physicians and physiotherapists in the country in a sustainable way.                                                                                                                                                                               |
| Edinger et al. 2019 <sup>86</sup>    | Rutgers University Office of Continuing Professional Education, USA          | First responders (n=33)                                                                              | People with developmental disabilities | A one-hour online workshop was held to improve disaster and critical care responders (knowledge and self-efficacy for working with people with developmental disabilities). The intervention included an overview of developmental disabilities, training on communication, and identification and interaction techniques.                                                 | x |   |   |  |   |   |   | knowledge, self-efficacy,                              | Overall knowledge improved from 66% correct to 81% correct, including significant (p<0.05) changes in 4 domains. Self-efficacy also improved from 53% on the pretest to 92% on the posttest, indicating an increase of 39% with significant (p<0.05) changes in all 10 domains.                                                                                                                                                                                             |
| Auberry et al. 2019 <sup>87</sup>    | Indiana University School of Nursing, USA                                    | Volunteer direct support professionals that worked with                                              | People with                            | Volunteers participated in sessions on medication administration for people with intellectual and developmental disabilities. The session was facilitated by a doctoral-                                                                                                                                                                                                   | x |   |   |  |   |   | x | knowledge, confidence                                  | Students significantly improved their knowledge and skills to administer a variety of medications through participating in the program (p<0.05 for all topics). They expressed greater confidence in treating patients                                                                                                                                                                                                                                                      |

|                                              |                                                                           |                                                                   |                                             |                                                                                                                                                                                                                                                                                                                                                                                               |   |  |  |  |  |  |  |   |                       |                                                                                                                                                                                                                                                                                                                                                                                                                                              |                                                                                                                                                                                                                                                                                                                                                                                                                                         |
|----------------------------------------------|---------------------------------------------------------------------------|-------------------------------------------------------------------|---------------------------------------------|-----------------------------------------------------------------------------------------------------------------------------------------------------------------------------------------------------------------------------------------------------------------------------------------------------------------------------------------------------------------------------------------------|---|--|--|--|--|--|--|---|-----------------------|----------------------------------------------------------------------------------------------------------------------------------------------------------------------------------------------------------------------------------------------------------------------------------------------------------------------------------------------------------------------------------------------------------------------------------------------|-----------------------------------------------------------------------------------------------------------------------------------------------------------------------------------------------------------------------------------------------------------------------------------------------------------------------------------------------------------------------------------------------------------------------------------------|
|                                              |                                                                           | intellectual and developmental disabilities (n=12)                | intellectual and developmental disabilities | trained and bachelor-trained registered nurse (RN) certified in developmental disability nursing covered various medication practice instructions through didactic lectures and simulations.                                                                                                                                                                                                  |   |  |  |  |  |  |  |   |                       |                                                                                                                                                                                                                                                                                                                                                                                                                                              | (p<0.02 for all metrics) and appreciated the opportunity to practice skills.                                                                                                                                                                                                                                                                                                                                                            |
| Olowoyeye et al. 2019 <sup>88</sup>          | Ifo Local Government Area, Ogun State, Nigeria                            | Maternal and child health care workers (MCHWs) (n=65)             | Children with visual impairments            | MCHWs participated in a pre-test and focus group discussion on leading causes, identification, management, and prevention of childhood blindness. Participants then participated in a lecture and practical session on eye diseases and asked to log any referrals following the intervention. After 3 months, the participants did a post-test questionnaire.                                | x |  |  |  |  |  |  | x | knowledge             | Participant's knowledge scores increased significantly after the training, particularly in identifying common diseases, locally available vitamins, and conjunctivitis prevention. 45.9% MCHWs felt they had inadequate training prior but did not significantly increase knowledge in immunizations for preventable blindness, or glaucoma/cataract treatment. Six children were referred for services because of the program.              |                                                                                                                                                                                                                                                                                                                                                                                                                                         |
| Cameron et al. 2017 <sup>89</sup>            | Metropolitan Hospital in Australia                                        | Health professionals (n=52)                                       | People with Aphasia                         | The intervention programme consisted of a 1-h lecture that discussed strategies for communicating effectively with people with aphasia (PWA). This lecture was provided by a speech language pathologist member of the research team. This was immediately followed by a 15–20-minute practical conversation with a PWA to facilitate application of the discussed strategies and approaches. | x |  |  |  |  |  |  | x | confidence, knowledge | The participants self-reported a mean confidence rating of 75.8 mm (SD= 12.2) after completing the training which was significantly higher than the rating of 46.6 mm (SD= 15.7) before completing the training (p< .001). At the pre-intervention assessment, participants identified a median of three strategies for facilitating communication with PWA. Following the training, the HPs were able to identify a total of 35 strategies. |                                                                                                                                                                                                                                                                                                                                                                                                                                         |
| Mac Giolla Phdraig et al. 2015 <sup>37</sup> | Residential care homes in Dublin, Ireland                                 | key care staff of residential home (n=22), people with ID (n=155) | People with intellectual disabilities       | 22 trainees from intervention group attended a multi-tiered oral health educational program on the oral health and oral hygiene of people with intellectual disabilities. Trainees were expected to train peers. A control group lived in centers where staff received no training.                                                                                                           | x |  |  |  |  |  |  |   | x                     | knowledge, attitude, self-efficacy                                                                                                                                                                                                                                                                                                                                                                                                           | The intervention improved the oral health-related knowledge, attitude, self-efficacy, and behavior of residential care-staff who provided care to a population of people with ID. A reduction in gingivitis and plaque scores were found in the people who lived in care homes where staff participated by 10.5% and 8.5% respectively, though not statistically significant between groups.                                            |
| Dagnan et al. 2018 <sup>17</sup>             | An English Improving Access to Psychological Therapies (IAPT) service, UK | Therapists (n=68)                                                 | People with intellectual disabilities       | Therapists working in an Improving Access to Psychological Therapies Service participated in a one- or two-day workshop on supporting people with intellectual. The workshop was divided into 8 sessions, including introduction to intellectual disability, stigma, assessment, adaptation of therapeutic techniques, approaches, and local services/resources.                              | x |  |  |  |  |  |  |   |                       | confidence, self-efficacy, attitude                                                                                                                                                                                                                                                                                                                                                                                                          | Therapists had improved confidence, self-efficacy, and attitudes across both therapist groups. There was a statistically significant improvement from pre- to post-training (p<0.001), and while improvements were sustained 3-months later, there was not a statistical significance. Qualitatively, several respondents noted the workshop increased awareness and sensitivity, adapted materials, communications, and interventions. |
| Catteau et al. 2013 <sup>90</sup>            | Dental practices across France                                            | Dentists (n=26)                                                   | People with disabilities                    | A 10-module online curriculum 'Autonomy and Oral Health' (30-50h of coursework) covered dental health for persons with disabilities, ranging from lack of autonomy to special care dentistry. Dentists also conducted an oral health promotion course for people with disabilities at institutions for children and adults.                                                                   | x |  |  |  |  |  |  |   | x                     | knowledge, self-efficacy                                                                                                                                                                                                                                                                                                                                                                                                                     | Dentists scored their self-efficacy significantly higher both after the online training (p<0.01) and after the course (p<0.05). Overall, 94% of the staff/caregivers of the institutions where dentists implemented their interventions indicated an improvement in the oral hygiene of the residents.                                                                                                                                  |

|                                              |                                                                   |                                                                                              |                                       |                                                                                                                                                                                                                                                                                                                                                                                                                                                                         |   |  |   |   |   |   |  |  |   |                                     |                                                                                                                                                                                                                                                                                                                                                                                                                   |
|----------------------------------------------|-------------------------------------------------------------------|----------------------------------------------------------------------------------------------|---------------------------------------|-------------------------------------------------------------------------------------------------------------------------------------------------------------------------------------------------------------------------------------------------------------------------------------------------------------------------------------------------------------------------------------------------------------------------------------------------------------------------|---|--|---|---|---|---|--|--|---|-------------------------------------|-------------------------------------------------------------------------------------------------------------------------------------------------------------------------------------------------------------------------------------------------------------------------------------------------------------------------------------------------------------------------------------------------------------------|
| Clark et al. 2019 <sup>33</sup>              | University of Rwanda                                              | Physical Therapists (n=66)                                                                   | Children with physical disabilities   | Physical therapists, to improve paediatric clinical decision making, were taught for a total of 48 hours over the course of 4 weekends. Teaching involved classroom lectures, small group case studies, laboratory skills practice, and clinical visits to participants place of work.                                                                                                                                                                                  | x |  | x |   |   |   |  |  |   | knowledge, confidence, competence   | Physical therapists' performance on paediatric rehabilitation knowledge questionnaire improved from an average of 53.7% pre course to 82.2% after the course. Participants indicated an increased confidence in the eight clinical skills taught, which was also observed by US based therapists on clinic visits.                                                                                                |
| Quinn and Smolinski 2018 <sup>31</sup>       | National Association of School Nurses annual conference, USAghent | School nurses (n=248)                                                                        | People with intellectual disabilities | School nurses participated in three-hour educational sessions that focused on increasing their knowledge related to pain and pain assessment for students with intellectual disabilities.                                                                                                                                                                                                                                                                               | x |  |   |   |   |   |  |  |   | knowledge, competence               | Before, school nurses rating their difficulty in identifying pain in ID students ranked it a 6 (range 1-10, SD=1.9) compared to 3.41 in neurotypical (range 0-10, SD=2.25) children. This decreased to 2 (range 1-7, SD=1.8, p<0.0001) post-session. 74% of nurses changed their practices and reported significant decreases in difficulty when assessing pain (p<0.0006-0.1) six months after the intervention. |
| Phlypo et al. 2018 <sup>92</sup>             | Ghent University and a local residential facility in Belgium      | Residential facility caregivers (n=99, control =42, intervention=37)                         | People with intellectual disabilities | Students initiated an oral health promotion project for people with intellectual disabilities and their caregivers living in a residential care home. Facility caregivers were randomized and those in the intervention group received a booklet including chapters on oral hygiene, nutrition, visiting the dentist and practical tips on providing health care for people with disabilities and an information session for residents and caregivers.                  | x |  |   |   |   |   |  |  |   | knowledge, attitudes, self-efficacy | Caregivers significantly improved their knowledge index in the intervention group (mean of 5.9 pre-intervention to 7.1 post-intervention, p=0.03). Both groups improved their behaviors, attitudes, and self-efficacy, but not in the intervention group and not significantly in the control group.                                                                                                              |
| Sanchez et al. 2017 <sup>93</sup>            | Federally Qualified Health Care Centre in Nogales, Arizona, USA   | Female community health-care workers (n=12), 4 of which participated in facilitator training | Hard of hearing and D/deaf people     | CHWs attended two-hour focus groups and a 3-hour workshop that included didactic methods and simulation. CHWs who participated in the workshop held community screenings and some participated in an additional 8 sessions over 6 weeks to become facilitators. The goal was to improve screening, understanding, referrals and effective communication.                                                                                                                | x |  | x | x | x |   |  |  |   | knowledge, confidence, competence   | CHWs knowledge and confidence regarding peer support for community members with hearing loss increased and they were able to apply their skills to specific situations and help address the audiological needs of the community.                                                                                                                                                                                  |
| Mac Giolla Phdraig et al. 2012 <sup>38</sup> | Community-based residential care homes in Dublin, Ireland         | Residential care home staff (n=219)                                                          | People with intellectual disabilities | 22 trainees from intervention group attended a day long training session provided by a team of oral health trainers (lectures, group based practical sessions, role play, group feedback). Trainees were given training packs to go back to care home and train peers. The control group received no training. The goal was to see if training can improve the Knowledge, Attitudes, Self-efficacy, and Reported Behaviour (KBAS) of the intellectual disability staff. | x |  |   |   | x | x |  |  |   | knowledge, competence, attitudes    | The mean knowledge index score for the intervention group rose from K= 7.23 (SD=1.34) to K= 7.86 (SD=1.27) p<0.0001. BAS scores also significantly increased from 4.73 (SD=1.32) to 5.42 (SD=1.51), p<0.0001. There was no significant difference in K and BAS scores in the control group.                                                                                                                       |
| Pasco et al. 2014 <sup>36</sup>              | Cities across Romania (Bucharest, Cluj, Iasi, Timisoara)          | Professional training programme (n=1075) online                                              |                                       | Three-stage training program to increase knowledge of ASD and share best practices (two 3-day courses, six 6-day courses, and 30h of supervised practice). Two online                                                                                                                                                                                                                                                                                                   | x |  |   |   |   | x |  |  | x | knowledge, competence               | Scores on the ASD knowledge test were found to increase from 6.9 before to 11 after the training session (p<0.05). Six-months after, 94% reported using the knowledge and skills in current practice. Overall, the                                                                                                                                                                                                |

|                                     |                                                  |                                                               |                                              |                                                                                                                                                                                                                          |   |  |   |  |  |  |  |   |                       |                                                                                                                                                                                                                                                 |                                                                                                                                                        |
|-------------------------------------|--------------------------------------------------|---------------------------------------------------------------|----------------------------------------------|--------------------------------------------------------------------------------------------------------------------------------------------------------------------------------------------------------------------------|---|--|---|--|--|--|--|---|-----------------------|-------------------------------------------------------------------------------------------------------------------------------------------------------------------------------------------------------------------------------------------------|--------------------------------------------------------------------------------------------------------------------------------------------------------|
|                                     |                                                  | course (n=613, general practitioners (GPs) and psychiatrists) | Autism spectrum disorder                     | courses for GPs and Psychiatrists on improving diagnosis and treatment were also offered, among other initiatives as part of a nationwide project to improve awareness and social inclusion of people with ASD.          |   |  |   |  |  |  |  |   |                       |                                                                                                                                                                                                                                                 | program enhanced knowledge and practical experience among medical professionals and other specialists working with children and young people with ASD. |
| Figueiras et al. 2014 <sup>94</sup> | 18 Municipal Health Units in Belém, Pará, Brazil | Health professionals in primary care (n=221)                  | Cerebral palsy, autism, and preterm newborns | A course including lectures, discussion, videos, readings, and practical assessments related to assessing developmental disabilities. Participants were followed up 1-3 years later to see the impact on their practice. | x |  | x |  |  |  |  | x | knowledge, competence | Health practitioners who participated significantly increased their knowledge and skills of child development (p<0.001). Mothers also identified that practitioners asked more about child development and intervened more after participating. |                                                                                                                                                        |

## REFERENCES

1. World Bank and World Health Organization. *World Report on Disability*. 2011:350. [https://www.who.int/disabilities/world\\_report/2011/report.pdf?ua=1](https://www.who.int/disabilities/world_report/2011/report.pdf?ua=1)
2. Kuper H, Heydt P. *The Missing Billion: Access to Health Services for 1 Billion People with Disabilities*. 2019:28. <https://www.lshtm.ac.uk/TheMissingBillion>
3. Convention on the Rights of Persons with Disabilities (CRPD), (2006). Accessed 2020/07/11/20:53:45. <https://www.un.org/development/desa/disabilities/convention-on-the-rights-of-persons-with-disabilities.html>
4. A new landmark resolution on disability adopted at the 74th World Health Assembly. World Health Organization; 2021. <https://www.who.int/news/item/27-05-2021-a-new-landmark-resolution-on-disability-adopted-at-the-74th-world-health-assembly>
5. Shakespeare T, Kleine I. Educating Health Professionals about Disability: A Review of Interventions. *Health and Social Care Education*. 2013;2(2):20-37. doi:10.11120/hsce.2013.00026
6. Ioegeer M, Flanders RM, French-Lawyer JR, Turk MA. Interventions to Teach Medical Students About Disability: A Systematic Search and Review. *Am J Phys Med Rehabil*. Jul 2019;98(7):577-599. doi:10.1097/PHM.0000000000001154
7. Ceglie K, Rispoli MJ, Flake EM. Training Medical Professionals to Work with Patients with Neurodevelopmental Disorders: A Systematic Review. *Developmental Neurorehabilitation*. 2020 Oct 2;23(7):463-73.
8. Guaranteeing Medicare – Improving the health of people with intellectual disability. 2021. <https://www.health.gov.au/sites/default/files/documents/2021/05/guaranteeing-medicare-improving-the-health-of-people-with-intellectual-disability.pdf>
9. Health Education E. The Oliver McGowan Mandatory Training in Learning Disability and Autism. *Health Education England*. 2020/08/07/T15:20:04+01:00 2020;
10. World Health O. *Classifying health workers: Mapping occupations to the international standard classification*. 2010. 2010/04/29/. Accessed 2021/06/16/. [https://www.who.int/hrh/statistics/Health\\_workers\\_classification.pdf](https://www.who.int/hrh/statistics/Health_workers_classification.pdf)
11. Ouzzani M, Hammady H, Fedorowicz Z, Elmagarmid A. Rayyan—a web and mobile app for systematic reviews. *Systematic Reviews*. 2016 2016;5(1)doi:10.1186/s13643-016-0384-4
12. Page MJ, McKenzie JE, Bossuyt PM, et al. The PRISMA 2020 statement: an updated guideline for reporting systematic reviews. *BMJ*. 2021/03/29/ 2021;372:n71. doi:10.1136/bmj.n71
13. Bright T, Wallace S, Kuper H. A Systematic Review of Access to Rehabilitation for People with Disabilities in Low- and Middle-Income Countries. *Int J Environ Res Public Health*. 2018;15(10)doi:10.3390/ijerph15102165
14. Gilmore M, Sturgeon A, Thomson C, et al. Changing medical students' attitudes to and knowledge of deafness: a mixed methods study. *Bmc Medical Education*. Jun 2019;19:227. doi:10.1186/s12909-019-1666-z
15. Bank TW. World Bank Country and Lending Groups. World Bank Group. Accessed 16 June, 2021.

16. Bailey N, Kaarto P, Burkey J, Bright D, Sohn M. Evaluation of an American Sign Language co-curricular training for pharmacy students. *Currents in Pharmacy Teaching and Learning*. Jan 2021;13(1):68-72. doi:10.1016/j.cptl.2020.08.002
17. Dagnan D, Masson J, Thwaites R, James A, Hatton C. Training therapists to work with people with intellectual disability in Improving Access to Psychological Therapies (IAPT) services. *Journal of applied research in intellectual disabilities : JARID*. 2018;31(5):760-767. doi:<http://dx.doi.org/10.1111/jar.12427>
18. Salama FS, Al-Balkhi BK. Effectiveness of educational intervention of oral health for special needs on knowledge of dental students in Saudi Arabia. *Disability and Health Journal*. Jan 2020;13(1)100789. doi:10.1016/j.dhjo.2019.03.005
19. Steedman M, Abouammoh M, Sharma S. Multimedia learning tools for teaching undergraduate ophthalmology: Results of a randomized clinical study. *Canadian Journal of Ophthalmology*. 2012;47(1):66-71. doi:<http://dx.doi.org/10.1016/j.jcjo.2011.12.006>
20. Abdi R, Metcalf E. Exploring attitudes of medical students towards intellectual disabilities. *Advances in Mental Health and Intellectual Disabilities*. Aug 2020;14(5):125-136. doi:10.1108/amhid-01-2020-0002
21. Lynch J, Last J, Dodd P, Stancila D, Linehan C. 'Understanding Disability': Evaluating a contact-based approach to enhancing attitudes and disability literacy of medical students. *Disability and Health Journal*. Jan 2019;12(1):65-71. doi:10.1016/j.dhjo.2018.07.007
22. Iannuzzi D, Rissmiller P, Duty SM, Feeney S, Sullivan M, Curtin C. Addressing a Gap in Healthcare Access for Transition-Age Youth with Autism: A Pilot Educational Intervention for Family Nurse Practitioner Students. *Journal of Autism and Developmental Disorders*. Apr 2019;49(4):1493-1504. doi:10.1007/s10803-018-3846-9
23. Cheek C, Hays R, Smith J, Allen P. Improving case study research in medical education: a systematised review. *Medical Education*. 2018/05// 2018;52(5):480-487. doi:10.1111/medu.13469
24. Mazurek MO, Stobbe G, Loftin R, et al. ECHO Autism Transition: Enhancing healthcare for adolescents and young adults with autism spectrum disorder. *Autism*. Apr 2020;24(3):633-644. 1362361319879616. doi:10.1177/1362361319879616
25. Sohl K, Mazurek MO, Brown R. ECHO Autism: Using Technology and Mentorship to Bridge Gaps, Increase Access to Care, and Bring Best Practice Autism Care to Primary Care. *Clinical Pediatrics*. 2017;56(6):509-511. doi:<http://dx.doi.org/10.1177/0009922817691825>
26. Chiang HC, Lin FY, Hwu YJ. Disability Assessment: The Efficacy of Multimedia Interactive Nurse Education. *Journal of Nursing Research*. Jun 2013;21(2):83-93. doi:10.1097/jnr.0b013e3182921f5a
27. Watmough S, Leftwick P, Alexander-White S. An evaluation of medical students' views on the introduction of a community placement and its impact on their understanding of patients with disabilities. *Education for primary care : an official publication of the Association of Course Organisers, National Association of GP Tutors, World Organisation of Family Doctors*. 2014;25(1):36-42.
28. Hensel D, Malinowski C, Watts PA. Implementing a Pediatric Camp Clinical for Pre-Licensure Education. *Nursing education perspectives*. 2015;36(1):60-61. doi:<https://dx.doi.org/10.5480/12-871.1>
29. VandeWaa E, Bealle Rudd A, Estis JM, Gordon-Hickey S. Safe Medication Administration in Patients with Communication Disorders: A Simulation-Enhanced Interprofessional Education Approach. *Journal of allied health*. 2019;48(4):257-262.

30. Sheepway L, Lincoln M, McAllister S. Impact of placement type on the development of clinical competency in speech-language pathology students. *International journal of language & communication disorders / Royal College of Speech & Language Therapists*. 2014;49(2):189-203. doi:<http://dx.doi.org/10.1111/1460-6984.12059>
31. Saldert C, Forsgren E, Hartelius L. Teaching medical students about communication in speech-language disorders: Effects of a lecture and a workshop. *International Journal of Speech-Language Pathology*. 2016;18(6):571-579. doi:10.3109/17549507.2016.1143975
32. Keisling BL, Bishop EA, Kube DA, Roth JM, Palmer FB. Long-term pediatrician outcomes of a parent led curriculum in developmental disabilities. *Research in Developmental Disabilities*. 2017;60:16-23. doi:<http://dx.doi.org/10.1016/j.ridd.2016.11.004>
33. Clark K, Smith CNW, Kohls L, et al. A global health training model for teaching pediatric clinical decision making skills to Rwandan physical therapists: A case report. *Physiotherapy Theory and Practice*. Sep 2019;35(9):891-903. doi:10.1080/09593985.2018.1458263
34. Symons AB, Morley CP, McGuigan D, Akl EA. A curriculum on care for people with disabilities: Effects on medical student self-reported attitudes and comfort level. *Disability and Health Journal*. Jan 2014;7(1):88-95. doi:10.1016/j.dhjo.2013.08.006
35. Garavatti E, Tucker J, Pabian PS. Utilization of an Interprofessional Integrated Clinical Education Experience to Improve Medical and Physical Therapy Student Comfort in Treating Patients with Disabilities. *Education for Health*. Sep-Dec 2018;31(3):155-162. doi:10.4103/efh.EfH\_177\_17
36. Pasco G, Clark B, Dragan I, et al. A training and development project to improve services and opportunities for social inclusion for children and young people with autism in Romania. *Autism*. Oct 2014;18(7):827-831. doi:10.1177/1362361314524642
37. Mac Giolla Phdraig C, Guerin S, Nunn J. Should we educate care staff to improve the oral health and oral hygiene of people with intellectual disability in residential care? Real world lessons from a randomized controlled trial. *Special care in dentistry : official publication of the American Association of Hospital Dentists, the Academy of Dentistry for the Handicapped, and the American Society for Geriatric Dentistry*. 2015;35(3):92-98. doi:<http://dx.doi.org/10.1111/scd.12102>
38. Mac Giolla Phdraig C, Guerin S, Nunn J. Train the trainer? A randomized controlled trial of a multi-tiered oral health education programme in community-based residential services for adults with intellectual disability. *Community dentistry and oral epidemiology*. 2013;41(2):182-92. doi:<https://dx.doi.org/10.1111/cdoe.12006>
39. Thew D, Smith SR, Chang C, Starr M. The Deaf Strong Hospital Program: A Model of Diversity and Inclusion Training for First-Year Medical Students. *Academic Medicine*. Nov 2012;87(11):1496-1500. doi:10.1097/ACM.0b013e31826d322d
40. Smith P, Ooms A, Marks-Maran D. Active involvement of learning disabilities service users in the development and delivery of a teaching session to pre-registration nurses: Students' perspectives. *Nurse education in practice*. 2016;16(1):111-118. doi:<http://dx.doi.org/10.1016/j.nepr.2015.09.010>
41. Lapinski J, Colonna C, Sexton P, Richard M. AMERICAN SIGN LANGUAGE AND DEAF CULTURE COMPETENCY OF OSTEOPATHIC MEDICAL STUDENTS. *American Annals of the Deaf*. Spr 2015;160(1):36-47. doi:10.1353/aad.2015.0014



42. Holzinger A, Lettner S, Franz A. Attitudes of dental students towards patients with special healthcare needs: Can they be improved? *European Journal of Dental Education*. May 2020;24(2):243-251. doi:10.1111/eje.12490
43. Saunder L, Knight RA. CitySCaPE: Moving beyond indifference in education for pre-registration nurses about learning disability. *Nurse education in practice*. 2017;26:82-88. doi:<http://dx.doi.org/10.1016/j.nepr.2017.07.008>
44. Santoro JD, Whitgob EE, Huffman LC. Cluster Randomized Controlled Trial of Disability Education Module During Clinical Clerkship. *Clinical Pediatrics*. Nov 2019;58(13):1387-1393. doi:10.1177/0009922819850475
45. Perusini DJ, Llacuachaqui M, Sigal MJ, Dempster LJ. Dental Students' Clinical Expectations and Experiences Treating Persons with Disabilities. *Journal of dental education*. 2016;80(3):301-310.
46. Castro SS, Rowe M, Andrade LF, Cyrino EG. Developing competencies among health professions students related to the care of people with disabilities: a pilot study. *Interface-Comunicacao Saude Educacao*. Apr-Jun 2018;22(65):551-563. doi:10.1590/1807-57622016.0684
47. Burrola-Mendez Y, Goldberg M, Gartz R, Pearlman J. Development of a Hybrid Course on Wheelchair Service Provision for clinicians in international contexts. *PLoS ONE*. 2019;13(6):e0199251. doi:<http://dx.doi.org/10.1371/journal.pone.0199251>
48. Mohebbi SZ, Chinipardaz Z, Batebi A. Effectiveness of training senior dental students on oral health care for disabled patients. *European Journal of Dental Education*. Nov 2014;18(4):214-221. doi:10.1111/eje.12090
49. Ahmad MS, Mokhtar IW, Khan NLA. Extramural oral health educational program involving individuals with disabilities: Impact on dental students' professionalism. *Journal of International Society of Preventive and Community Dentistry*. May-Jun 2020;10(3):323-328. doi:10.4103/jispcd.JISPCD\_74\_20
50. Crane JM, Strickler JG, Lash AT, et al. Getting comfortable with disability: The short- and long-term effects of a clinical encounter. *Disability and Health Journal*. 2020:100993. doi:<http://dx.doi.org/10.1016/j.dhjo.2020.100993>
51. Tai S, Woodward-Kron R, Barr C. Audiology Students' Perspectives of Enacting and Learning Clinical Communication: A Qualitative Interview and Video Reflexivity Study. *American Journal of Audiology*. Jun 2018;27(2):219-230. doi:10.1044/2018\_aja-17-0097
52. Ozkan F, Uslu N, Zincir H. Effect of practices for mentally disabled children on attitudes of nursing students. *Cukurova Medical Journal*. 2020;45(3):851-859. doi:10.17826/cumj.715000
53. Sinai A, Strydom A, Hassiotis A. Evaluation of medical students' attitudes towards people with intellectual disabilities: a naturalistic study in one medical school. *Advances in Mental Health and Intellectual Disabilities*. 2013;7(1):18-26. doi:<http://dx.doi.org/10.1108/20441281311294666>
54. Shields LBE, Peppas DS, Rosenberg E. Renal Calculus in Floating-Harbor Syndrome: A Case Report. *Journal of Pediatric Health Care*. Jan 2019;33(1):97-101. doi:10.1016/j.pedhc.2018.07.009
55. Watkins LV, Colgate R. Improving healthcare for people with intellectual disabilities: the development of an evidence-based teaching programme. *Advances in Mental Health and Intellectual Disabilities*. 2016;10(6):333-341. doi:10.1108/amhid-07-2016-0009
56. Forsgren E, Hartelius L, Saldert C. Improving medical students' knowledge and skill in communicating with people with acquired communication disorders. *International journal of*

*speech-language pathology*. 2017;19(6):541-550.

doi:<http://dx.doi.org/10.1080/17549507.2016.1216602>

57. McIntosh CE, Thomas CM, Wilczynski S, McIntosh DE. Increasing Nursing Students' Knowledge of Autism Spectrum Disorder by Using a Standardized Patient. *Nursing education perspectives*. 2018;39(1):32-34. doi:<http://dx.doi.org/10.1097/01.NEP.0000000000000179>

58. Woodard LJ, Havercamp SM, Zwygart KK, Perkins EA. An Innovative Clerkship Module Focused on Patients With Disabilities. *Academic Medicine*. Apr 2012;87(4):537-542. doi:10.1097/ACM.0b013e318248ed0a

59. Jones J, McQueen M, Lowe S, Minnes P, Rischke A. Interprofessional Education in Canada: Addressing Knowledge, Skills, and Attitudes Concerning Intellectual Disability for Future Healthcare Professionals. *Journal of Policy and Practice in Intellectual Disabilities*. Sep 2015;12(3):172-180. doi:10.1111/jppi.12112

60. Beverly BL, Wooster D. An Interprofessional Education Initiative for Allied Health Students Preparing to Serve Individuals with Autism Spectrum Disorders. *Journal of allied health*. 2018;47(2):90-95.

61. Coret A, Boyd K, Hobbs K, Zazulak J, McConnell M. Patient Narratives as a Teaching Tool: A Pilot Study of First-Year Medical Students and Patient Educators Affected by Intellectual/Developmental Disabilities. *Teaching and Learning in Medicine*. 2018;30(3):317-327. doi:10.1080/10401334.2017.1398653

62. Jain S, Foster E, Biery N, Boyle V. Patients With Disabilities as Teachers. *Family Medicine*. Jan 2013;45(1):37-39.

63. Karl R, McGuigan D, Withiam-Leitch ML, Akl EA, Symons AB. Reflective Impressions of a Precepted Clinical Experience Caring for People With Disabilities. *Intellectual and Developmental Disabilities*. Aug 2013;51(4):237-245. doi:10.1352/1934-9556-51.4.237

64. Thomas B, Courtenay K, Hassiotis A, Strydom A, Rantell K. Standardised patients with intellectual disabilities in training tomorrow's doctors. *BJPsyche Bulletin*. 2014;38(3):132-136. doi:<http://dx.doi.org/10.1192/pb.bp.113.043547>

65. Baylor C, Burns M, McDonough K, Mach H, Yorkston K. Teaching Medical Students Skills for Effective Communication With Patients Who Have Communication Disorders. *American Journal of Speech-Language Pathology*. Feb 2019;28(1):155-164. doi:10.1044/2018\_ajslp-18-0130

66. Saunder L, Berridge EJ. Immersive simulated reality scenarios for enhancing students' experience of people with learning disabilities across all fields of nurse education. *Nurse Education in Practice*. Nov 2015;15(6):397-402. doi:10.1016/j.nepr.2015.04.007

67. Dyer K, Aubeeluck A, Yates NL, Das Nair R. A Multiple Timepoint Pre-post Evaluation of a 'Sexual Respect' DVD to Improve Competence in Discussing Sex with Patients with Disability. *Sexuality and Disability*. Sep 2015;33(3):385-397. doi:10.1007/s11195-014-9375-3

68. Provident IM, Colmer MA. Muscular dystrophy summer camp: A case study of a non-traditional level I fieldwork using a collaborative supervision model. *Work*. 2013;44(3):337-404. doi:10.3233/wor-121510

69. Adib-Hajbaghery M, Rezaei-Shahsavarloo Z. Nursing students' knowledge of and performance in communicating with patients with hearing impairment. *Japan journal of nursing science : JJNS*. 2015;12(2):135-44. doi:<https://dx.doi.org/10.1111/jjns.12057>

70. Tate JA, Newtz C, Ali A, Happ MB. Advancing Patient-Centered Communication Content for Prelicensure Nursing Students Using StudentSPEACS. *Nurse Educator*. Jul-Aug 2020;45(4):E36-E40. doi:10.1097/nne.0000000000000785

71. Theoret C, Patel R, Thangamathesvaran L, Shah R, Chen S, Traba C. Creating Disability-Competent Medical Students Via Community Outreach. *Journal of the National Medical Association*. 2020;doi:<http://dx.doi.org/10.1016/j.jnma.2020.07.010>
72. Watters AL, Stabulas-Savage J, Toppin JD, Janal MN, Robbins MR. Incorporating Experiential Learning Techniques to Improve Self-Efficacy in Clinical Special Care Dentistry Education. *Journal of Dental Education*. Sep 2015;79(9):1016-1023.
73. Vento-Wilson MT, McGuire A, Ostergren JA. Role of the Speech-Language Pathologist Augmentative and Alternative Communication for Acute Care Patients With Severe Communication Impairments. *Dimensions of Critical Care Nursing*. Mar-Apr 2015;34(2):112-119. doi:10.1097/dcc.000000000000094
74. Kirshblum S, Murray R, Potpally N, Foye PM, Dyson-Hudson T, DallaPiazza M. An introductory educational session improves medical student knowledge and comfort levels in caring for patients with physical disabilities. *Disability and Health Journal*. Jan 2020;13(1)100825. doi:10.1016/j.dhjo.2019.100825
75. Read S, Rushton A. Cultivating understanding of health issues for adults with intellectual disability. *Nurse Education Today*. Sep 2013;33(9):1020-1025. doi:10.1016/j.nedt.2012.03.013
76. Major NE, Peacock G, Ruben W, Thomas J, Weitzman CC. Autism Training in Pediatric Residency: Evaluation of a Case-Based Curriculum. *Journal of Autism and Developmental Disorders*. May 2013;43(5):1171-1177. doi:10.1007/s10803-012-1662-1
77. Tuffrey-Wijne I, Rose T, Grant R, Wijne A. Communicating about death and dying: Developing training for staff working in services for people with intellectual disabilities. *Journal of Applied Research in Intellectual Disabilities*. Nov 2017;30(6):1099-1110. doi:10.1111/jar.12382
78. Toro ML, Bird E, Oyster M, et al. Development of a wheelchair maintenance training programme and questionnaire for clinicians and wheelchair users. *Disability and Rehabilitation Assistive technology*. 2017;12(8):843-851. doi:<http://dx.doi.org/10.1080/17483107.2016.1277792>
79. Bogetz JF, Gabhart JM, Rassbach CE, et al. Outcomes of a Randomized Controlled Educational Intervention to Train Pediatric Residents on Caring for Children With Special Health Care Needs. *Clinical Pediatrics*. Jun 2015;54(7):659-666. doi:10.1177/0009922814564050
80. Casson I, Abells D, Boyd K, et al. Teaching family medicine residents about care of adults with intellectual and developmental disabilities. *Canadian Family Physician*. Apr 2019;65:S35-S40.
81. McGonigle JJ, Migyanka JM, Glor-Scheib SJ, et al. Development and evaluation of educational materials for pre-hospital and emergency department personnel on the care of patients with autism spectrum disorder. *Journal of Autism and Developmental Disorders*. 2014;44(5):1252-1259. doi:<http://dx.doi.org/10.1007/s10803-013-1962-0>
82. Doyle SD, Bennett S. Feasibility and effect of a professional education workshop for occupational therapists' management of upper-limb poststroke sensory impairment. *The American journal of occupational therapy : official publication of the American Occupational Therapy Association*. 2014;68(3):e74-e83. doi:<http://dx.doi.org/10.5014/ajot.2014.009019>
83. Dunleavy K, Chevan J, Sander AP, Gasherebuka JD, Mann M. Application of a contextual instructional framework in a continuing professional development training program for physiotherapists in Rwanda. *Disability and Rehabilitation*. 2018;40(13):1600-1608. doi:10.1080/09638288.2017.1300692

84. Mazurek MO, Parker RA, Chan J, Kuhlthau K, Sohl K, Collaborative EA. Effectiveness of the Extension for Community Health Outcomes Model as Applied to Primary Care for Autism A Partial Stepped-Wedge Randomized Clinical Trial. *Jama Pediatrics*. May 2020;174(5):e196306. doi:10.1001/jamapediatrics.2019.6306
85. Locke HN, Doctors S, Randriamampianina I, Chamberlain MA, O'Connor RJ. EVALUATING A GLOBAL HEALTH PARTNERSHIP REHABILITATION TRAINING PROGRAMME IN MADAGASCAR. *Journal of Rehabilitation Medicine*. Dec 2019;51(11):847-853. doi:10.2340/16501977-2621
86. Edinger ZS, Powers KA, Jordan KS, Callaway DW. Evaluation of an online educational intervention to increase knowledge and self-efficacy in disaster responders and critical care transporters caring for individuals with developmental disabilities. *Disaster Medicine and Public Health Preparedness*. 2019;13(4):677-681.
87. Auberry K, Wills K, Shaver C. Improving medication practices for persons with intellectual and developmental disability: Educating direct support staff using simulation, debriefing, and reflection. *Journal of Intellectual Disabilities*. 2019;23(4):498-511. doi:<http://dx.doi.org/10.1177/1744629517731231>
88. Olowoyeye AO, Musa KO, Aribaba OT. Outcome of training of maternal and child health workers in Ifo Local Government Area, Ogun State, Nigeria, on common childhood blinding diseases: a pre-test, post-test, one-group quasi-experimental study. *Bmc Health Services Research*. Jun 2019;19430. doi:10.1186/s12913-019-4272-1
89. Cameron A, McPhail SM, Hudson K, Fleming J, Lethlean J, Finch E. A pre-post intervention study investigating the confidence and knowledge of health professionals communicating with people with aphasia in a metropolitan hospital. *Aphasiology*. 2017;31(3):359-374. doi:<http://dx.doi.org/10.1080/02687038.2016.1225277>
90. Catteau C, Faulks D, Mishellany-Dutour A, et al. Using e-learning to train dentists in the development of standardised oral health promotion interventions for persons with disability. *European Journal of Dental Education*. Aug 2013;17(3):143-153. doi:10.1111/eje.12024
91. Quinn BL, Smolinski M. Improving School Nurse Pain Assessment Practices for Students With Intellectual Disability. *Journal of School Nursing*. Dec 2018;34(6):480-488. doi:10.1177/1059840517722591
92. Phlypo I, De Tobel J, Marks L, De Visschere L, Koole S. Integrating community service learning in undergraduate dental education: A controlled trial in a residential facility for people with intellectual disabilities. *Special Care in Dentistry*. Jul-Aug 2018;38(4):201-207. doi:10.1111/scd.12298
93. Sanchez D, Adamovich S, Ingram M, et al. The potential in preparing community health workers to address hearing loss. *Journal of the American Academy of Audiology*. 2017;28(6):562-574. doi:<http://dx.doi.org/10.3766/jaaa.16045>
94. Figueiras ACM, Puccini RF, Silva EMK. Continuing education on child development for primary healthcare professionals: a prospective before-and-after study. *Sao Paulo Medical Journal*. 2014;132(4):211-218. doi:10.1590/1516-3180.2014.1324665
